# Supplementary material
Source: PubMed Central journal article supplement (PMC4387520)
Supplement: rsif20141294supp1.pdf [file rsif20141294supp1.pdf]

# Eyelashes divert flows to protect eye: Supplementary Information

Guillermo J. Amador<sup>1</sup>, Wenbin Mao<sup>1</sup>, Peter DeMercurio<sup>1</sup>, Carmen Montero<sup>1</sup>,  
Joel Clewis<sup>1</sup>, Alexander Alexeev<sup>1</sup>, David L. Hu<sup>1,2,\*</sup>  
Schools of Mechanical Engineering<sup>1</sup> and Biology<sup>2</sup>  
Georgia Institute of Technology  
\* Corresponding author: hu@me.gatech.edu

January 16, 2015

## Velocity Field Verification

**Fig.S1** shows the velocity fields for coarse and fine grids for comparison. The fine grid is 1.5 times more dense.

## Animal Eyelashes

Table 1 shows tabulated data for eye and eyelash dimensions of 22 mammal species. This data was gathered at the American Museum of Natural History and Brodericks Head Taxidermy shop. Walking speeds were obtained from literature [1–8].

Table 2 shows tabulated data for our extensive investigation to determine which families of mammals have species with eyelashes.

## References

- [1] Wroot, A. J. *Feeding ecology of the European hedgehog *Erinaceus europaeus**. (Royal Holloway, University of London, 1984).
- [2] Seipel, S. & Seipel, T. *Giant Anteaters* (Lerner Publications, 2008).
- [3] O'Neill, M. C. Gait-specific metabolic costs and preferred speeds in ring-tailed lemurs (*Lemur catta*), with implications for the scaling of locomotor costs. *American Journal of Physical Anthropology* **149**, 356–364 (2012).
- [4] Parchman, A. J., Reilly, S. M. & Biknevicius, A. R. Whole-body mechanics and gaits in the gray short-tailed opossum *Monodelphis domestica*: integrating patterns of locomotion in a semi-erect mammal. *Journal of Experimental Biology* **206**, 1379–1388 (2003).
- [5] San Diego Zoo. Giant panda, *Ailuropoda melanoleuca* (2011). URL [http://library.sandiegozoo.org/factsheets/giant\\_panda/panda.htm](http://library.sandiegozoo.org/factsheets/giant_panda/panda.htm).
- [6] Sockol, M. D., Raichlen, D. A. & Pontzer, H. Chimpanzee locomotor energetics and the origin of human bipedalism. *Proceedings of the National Academy of Sciences* **104**, 12265–12269 (2007).
- [7] Dumont, B., Dutronc, A. & Petit, M. How readily will sheep walk for a preferred forage? *Journal of Animal Science* **76**, 965–971 (1998).
- [8] Yousef, M., Webster, M. & Yousef, O. Energy costs of walking in camels, *Camelus dromedarius*. *Physiological Zoology* 1080–1088 (1989).

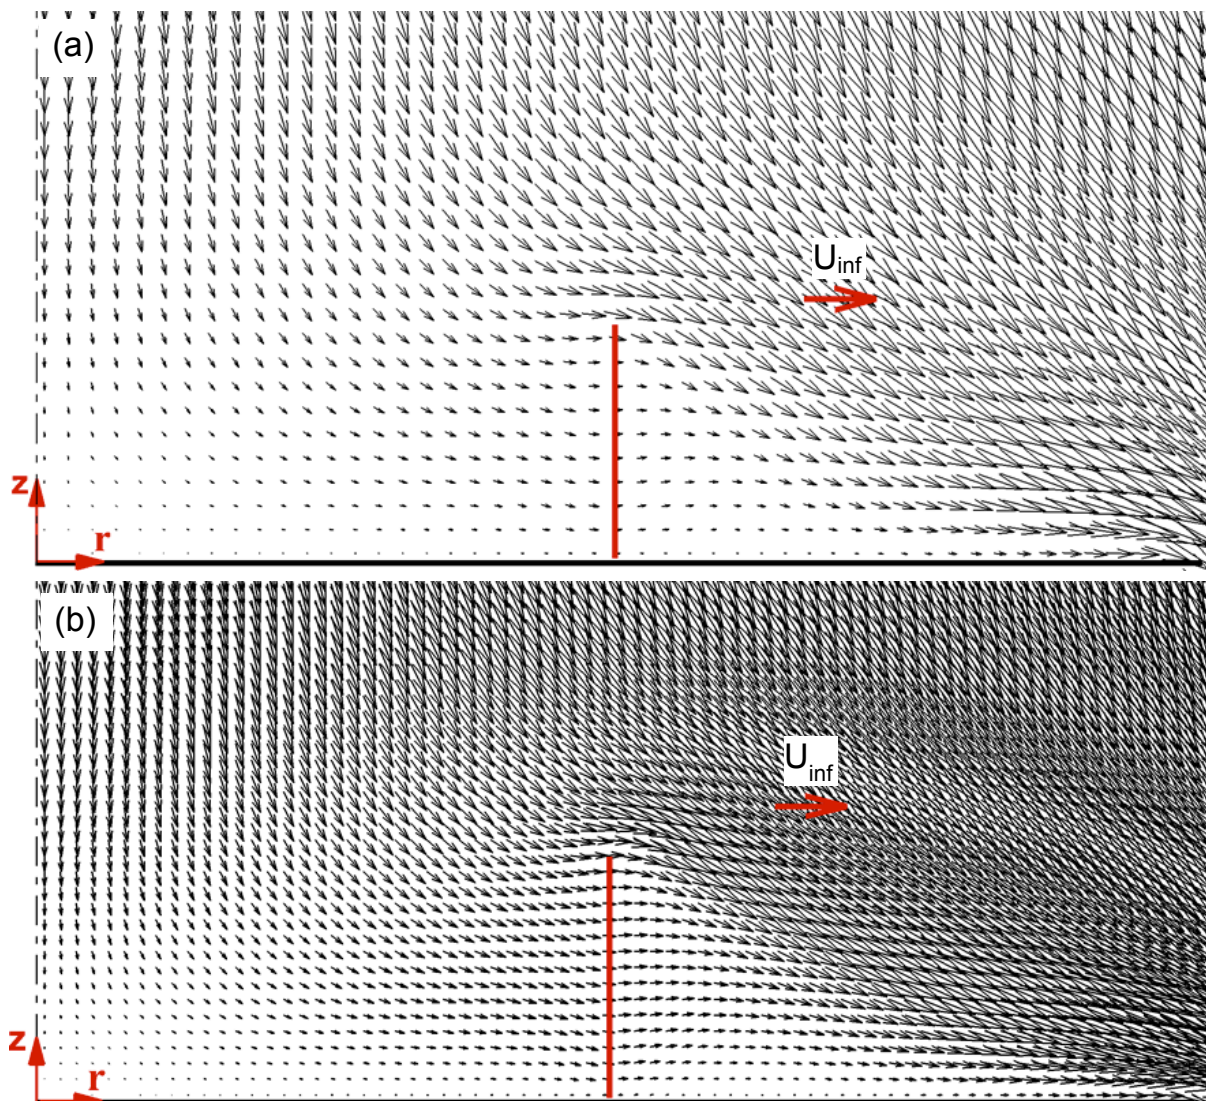

**Figure S1:** Velocity fields around the eyelashes at  $Re = 250$ ,  $\phi = 0.5$ ,  $L/W = 0.2$ . (a) Coarse grid. (b) Fine grid. Here,  $U_{inf} = ar$  is the free stream radial velocity.

**Table 1:** Tabulated eyelash data for mammals.

| Species                          | Common name              | Eye width<br>$W$ (cm) | Eyelash length<br>$L$ (cm) | Walking<br>Speed $V$ (m/s) | Reynolds<br>number | Eyelash<br>Diameter $d$<br>(cm) |
|----------------------------------|--------------------------|-----------------------|----------------------------|----------------------------|--------------------|---------------------------------|
| <i>Dasypus novemcinctus</i>      | Nine-banded armadillo    | 0.57                  | 0.13                       | 0.15                       | 54                 |                                 |
| <i>Erinaceus amurensis</i>       | Amur hedgehog            | 0.39                  | 0.23                       | 0.05                       | 12                 |                                 |
| <i>Tamandua mexicana</i>         | Northern tamandua        | 0.74                  | 0.23                       | 0.22                       | 100                | 0.006                           |
| <i>Petrodromus tetradactylus</i> | (Anteater)               |                       |                            |                            |                    |                                 |
|                                  | Elephant shrew           | 0.58                  | 0.41                       |                            |                    |                                 |
| <i>Tamandua mexicana</i>         | Northern tamandua        | 0.52                  | 0.33                       | 0.05                       | 16                 | 0.008                           |
|                                  | (Anteater)               |                       |                            |                            |                    |                                 |
| <i>Eulemur fulvus</i>            | Red-fronted lemur        | 1.08                  | 0.43                       | 0.50                       | 340                | 0.005                           |
| <i>Didelphis virginiana</i>      | Virginia opossum         | 0.72                  | 0.24                       | 0.64                       | 290                | 0.008                           |
| <i>Erethizon dorsatum</i>        | Porcupine                | 0.70                  | 0.36                       |                            |                    | 0.008                           |
| <i>Ailurus fulgens</i>           | Red panda                | 1.52                  | 0.32                       |                            |                    | 0.010                           |
| <i>Lepus californicus</i>        | Black-tailed jack rabbit | 0.92                  | 0.61                       |                            |                    | 0.004                           |
| <i>Taxidea taxus</i>             | American badger          | 1.75                  | 0.42                       |                            |                    | 0.008                           |
| <i>Aeluropus melanoleuca</i>     | Panda                    | 1.89                  | 0.60                       | 0.69                       | 830                |                                 |
| <i>Herpailurus yaguarondi</i>    | Small cat or Jaguarundi  | 1.98                  | 0.38                       |                            |                    | 0.008                           |
| <i>Pan troglodytes</i>           | Chimpanzee               | 1.98                  | 0.47                       | 1.00                       | 1200               | 0.010                           |
| <i>Ovis ammon</i>                | Gobi argali (Wild sheep) | 2.02                  | 0.95                       | 1.29                       | 1600               | 0.008                           |
| <i>Camelus dromedarius</i>       | Camel                    | 2.20                  | 0.76                       | 1.12                       | 1500               |                                 |
| <i>Uncia uncia</i>               | Snow leopard             | 2.41                  | 0.89                       |                            |                    | 0.010                           |
| <i>Puma concolor</i>             | Cougar                   | 2.54                  | 0.86                       | 4.47                       | 7100               | 0.010                           |
| <i>Tapirus bairdii</i>           | Baird's tapir            | 2.60                  | 1.21                       |                            |                    | 0.010                           |
| <i>Lycaon pictus</i>             | African wild dog         | 2.64                  | 0.76                       |                            |                    | 0.011                           |
| <i>Pan troglodytes</i>           | Chimpanzee               | 2.79                  | 0.70                       | 1.00                       | 1800               | 0.010                           |
| <i>Sus scrofa</i>                | Wild boar                | 2.92                  | 0.80                       |                            |                    | 0.020                           |
| <i>Giraffa camelopardalis</i>    | Giraffe                  | 2.93                  | 1.47                       |                            |                    |                                 |
| <i>Macropus rufus</i>            | Red kangaroo             | 3.09                  | 0.67                       |                            |                    | 0.014                           |
| <i>Giraffa camelopardalis</i>    | Giraffe                  | 4.08                  | 1.66                       |                            |                    |                                 |

**Table 1:** Tabulated eyelash data for mammals.

| <b>Species</b>                   | <b>Common name</b>       | <b>Eye width<br/>W (cm)</b> | <b>Eyelash length<br/>L (cm)</b> |
|----------------------------------|--------------------------|-----------------------------|----------------------------------|
| <i>Dasypus novemcinctus</i>      | Nine-banded armadillo    | 0.57                        | 0.13                             |
| <i>Erinaceus amurensis</i>       | Amur hedgehog            | 0.39                        | 0.23                             |
| <i>Tamandua mexicana</i>         | Northern tamandua        | 0.74                        | 0.23                             |
| <i>Petrodromus tetradactylus</i> | (Anteater)               |                             |                                  |
|                                  | Elephant shrew           | 0.58                        | 0.41                             |
| <i>Tamandua mexicana</i>         | Northern tamandua        | 0.52                        | 0.33                             |
| <i>Eulemur fulvus</i>            | (Anteater)               |                             |                                  |
|                                  | Red-fronted lemur        | 1.08                        | 0.43                             |
| <i>Didelphis virginiana</i>      | Virginia opossum         | 0.72                        | 0.24                             |
| <i>Erethizon dorsatum</i>        | Porcupine                | 0.70                        | 0.36                             |
| <i>Ailurus fulgens</i>           | Red panda                | 1.52                        | 0.32                             |
| <i>Lepus californicus</i>        | Black-tailed jack rabbit | 0.92                        | 0.61                             |
| <i>Taxidea taxus</i>             | American badger          | 1.75                        | 0.42                             |
| <i>Aeluropus melanoleuca</i>     | Panda                    | 1.89                        | 0.60                             |
| <i>Herpailurus yaguarondi</i>    | Small cat or Jaguarundi  | 1.98                        | 0.38                             |
| <i>Pan troglodytes</i>           | Chimpanzee               | 1.98                        | 0.47                             |
| <i>Ovis ammon</i>                | Gobi argali (Wild sheep) | 2.02                        | 0.95                             |
| <i>Camelus dromedarius</i>       | Camel                    | 2.20                        | 0.76                             |
| <i>Uncia uncia</i>               | Snow leopard             | 2.41                        | 0.89                             |
| <i>Puma concolor</i>             | Cougar                   | 2.54                        | 0.86                             |
| <i>Tapirus bairdii</i>           | Baird's tapir            | 2.60                        | 1.21                             |
| <i>Lycaon pictus</i>             | African wild dog         | 2.64                        | 0.76                             |
| <i>Pan troglodytes</i>           | Chimpanzee               | 2.79                        | 0.70                             |
| <i>Sus scrofa</i>                | Wild boar                | 2.92                        | 0.80                             |
| <i>Giraffa camelopardalis</i>    | Giraffe                  | 2.93                        | 1.47                             |
| <i>Macropus rufus</i>            | Red kangaroo             | 3.09                        | 0.67                             |
| <i>Giraffa camelopardalis</i>    | Giraffe                  | 4.08                        | 1.66                             |

**Table 2:** Tabulated data for presence of eyelashes for mammals.

| <b>Proper Name (Family)</b> | <b>Common Name (Example)</b>                       | <b>Has eyelashes/fur</b> | <b>Photo</b>                                                                                                                                                                                                                                                                                                                                    |
|-----------------------------|----------------------------------------------------|--------------------------|-------------------------------------------------------------------------------------------------------------------------------------------------------------------------------------------------------------------------------------------------------------------------------------------------------------------------------------------------|
| <i>Abrocomidae</i>          | Chinchilla<br>rats or chinchillones                | Yes, there's fur         | <a href="http://farm3.staticflickr.com/2458/3658723390_70176803dc_o.jpg">http://farm3.staticflickr.com/2458/3658723390_70176803dc_o.jpg</a>                                                                                                                                                                                                     |
| <i>Aplodontiidae</i>        | Mountain beaver                                    | Yes, there's fur         | <a href="https://www.mountainvalleyliving.com/online/wp-content/uploads/2010/01/bigstockphoto_Beaver_2812482.jpg">https://www.mountainvalleyliving.com/online/wp-content/uploads/2010/01/bigstockphoto_Beaver_2812482.jpg</a>                                                                                                                   |
| <i>Castoridae</i>           | North American beaver                              | Yes, there's fur         | <a href="http://ferrebeekeeper.files.wordpress.com/2011/06/castor-fiber.jpg">http://ferrebeekeeper.files.wordpress.com/2011/06/castor-fiber.jpg</a>                                                                                                                                                                                             |
| <i>Nycteridae</i>           | Hollow-faced bats                                  | Yes, there's fur         | <a href="http://en.academic.ru/pictures/enwiki/78/Nycteris_thebaica.jpg">http://en.academic.ru/pictures/enwiki/78/Nycteris_thebaica.jpg</a>                                                                                                                                                                                                     |
| <i>Phyllostomidae</i>       | Leaf-nosed bats                                    | Yes, there's fur         | <a href="http://cdn1.arkive.org/media/1D/1D7B10F1-F155-4A5F-A630-218BBA6223FF/Presentation.Large/Shield-nosed-leaf-nosed-bat-with-wings-visible.jpg">http://cdn1.arkive.org/media/1D/1D7B10F1-F155-4A5F-A630-218BBA6223FF/Presentation.Large/Shield-nosed-leaf-nosed-bat-with-wings-visible.jpg</a>                                             |
| <i>Prionodontidae</i>       | Banded linsang                                     | Yes, there's fur         | <a href="http://photos.zoochat.com/large/8a_0278-205341.jpg">http://photos.zoochat.com/large/8a_0278-205341.jpg</a>                                                                                                                                                                                                                             |
| <i>Solenodontidae</i>       | Cuban solenodon                                    | Yes, there's fur         | <a href="http://news.bbcimg.co.uk/media/images/63953000/jpg/_63953547_solenodon.jpg">http://news.bbcimg.co.uk/media/images/63953000/jpg/_63953547_solenodon.jpg</a>                                                                                                                                                                             |
| <i>Thryonomyidae</i>        | Cane rats                                          | Yes, there's fur         | <a href="http://writersthinkingallowed.files.wordpress.com/2012/10/cane.jpg">http://writersthinkingallowed.files.wordpress.com/2012/10/cane.jpg</a>                                                                                                                                                                                             |
| <i>Dasyproctidae</i>        | Acouchis                                           | Yes, there's fur         | <a href="http://farm3.staticflickr.com/2106/2439301067_f96493bef1_o.jpg">http://farm3.staticflickr.com/2106/2439301067_f96493bef1_o.jpg</a>                                                                                                                                                                                                     |
| <i>Callitrichidae</i>       | Marmosets and tamarins                             | Yes, there's fur         | TAMARIN:<br><a href="http://farm6.staticflickr.com/5053/5510281132_6d28dfb29a_o.jpg">http://farm6.staticflickr.com/5053/5510281132_6d28dfb29a_o.jpg</a><br>MARMOSET:<br><a href="http://www.robertodemicheli.com/album_test/Wildlife/Misc/slides/_MG_3583.jpg">http://www.robertodemicheli.com/album_test/Wildlife/Misc/slides/_MG_3583.jpg</a> |
| <i>Caviidae</i>             | Domestic guinea pig, wild cavies, and the capybara | Yes, there's fur         | <a href="https://upload.wikimedia.org/wikipedia/commons/8/8c/Guinea_Pig_35.jpg">https://upload.wikimedia.org/wikipedia/commons/8/8c/Guinea_Pig_35.jpg</a>                                                                                                                                                                                       |
| <i>Chinchillidae</i>        | Chinchillas                                        | Yes, there's fur         | <a href="http://www.chincare.com/IMAGES/healthmed/cataract.jpg">http://www.chincare.com/IMAGES/healthmed/cataract.jpg</a>                                                                                                                                                                                                                       |
| <i>Cricetidae</i>           | Voles                                              | Yes, there's fur         | <a href="http://www.eastrocklandscape.com/field_vole.jpg">http://www.eastrocklandscape.com/field_vole.jpg</a>                                                                                                                                                                                                                                   |
| <i>Ctenodactylidae</i>      | Gundis or comb rats                                | Yes, there's fur         | <a href="http://photos.zoochat.com/large/gundi_stuttgart_6th_september_2010-122957.jpg">http://photos.zoochat.com/large/gundi_stuttgart_6th_september_2010-122957.jpg</a>                                                                                                                                                                       |
| <i>Ctenomyidae</i>          | Tuco-tuco                                          | Yes, there's fur         | <a href="http://www.fotonaturaleza.cl/data/media/2/IMG_0946crop9.jpg">http://www.fotonaturaleza.cl/data/media/2/IMG_0946crop9.jpg</a>                                                                                                                                                                                                           |
| <i>Cyclopedidae</i>         | Silky anteater                                     | Yes, there's fur         | <a href="https://lh4.googleusercontent.com/-SCEbIXEUFKY/SmE-uZw9iJI/AAAAAAAAABsw/rMCj5xH2gfo/IMG_0519.JPG">https://lh4.googleusercontent.com/-SCEbIXEUFKY/SmE-uZw9iJI/AAAAAAAAABsw/rMCj5xH2gfo/IMG_0519.JPG</a>                                                                                                                                 |
| <i>Cynocephalidae</i>       | Colugos                                            | Yes, there's fur         | <a href="http://daddu.net/wp-content/uploads/2010/02/Colugo-view.jpg">http://daddu.net/wp-content/uploads/2010/02/Colugo-view.jpg</a>                                                                                                                                                                                                           |
| <i>Daubentoniidae</i>       | Aye-aye (Lemur)                                    | Yes, there's fur         | <a href="http://i3.ytimg.com/vi/jHs5POy8-8Y/maxresdefault.jpg">http://i3.ytimg.com/vi/jHs5POy8-8Y/maxresdefault.jpg</a>                                                                                                                                                                                                                         |
| <i>Dinomyidae</i>           | Pacarana                                           | Yes, there's fur         | <a href="http://www.machupicchu360.org/machu-picchu-peru/photo-gallery-machu-picchu/fotos_fauna/machu-picchu-fotos-19c.jpg">http://www.machupicchu360.org/machu-picchu-peru/photo-gallery-machu-picchu/fotos_fauna/machu-picchu-fotos-19c.jpg</a>                                                                                               |
| <i>Dipodidae</i>            | Jumping mice                                       | Yes, there's fur         | <a href="http://www2.ohiodnr.com/portals/wildlife/Species%20and%20Habitats/Species%20Guide%20Index/Images/housemouse.jpg">http://www2.ohiodnr.com/portals/wildlife/Species%20and%20Habitats/Species%20Guide%20Index/Images/housemouse.jpg</a>                                                                                                   |
| <i>Echimyidae</i>           | Neotropical spiny rats                             | Yes, there's fur         | <a href="http://en.wikipedia.org/wiki/Echimyidae#mediaviewer/File:Hoplomys_gymnurus2.jpg">http://en.wikipedia.org/wiki/Echimyidae#mediaviewer/File:Hoplomys_gymnurus2.jpg</a>                                                                                                                                                                   |
| <i>Emballonuridae</i>       | Ghost bat                                          | Yes, there's fur         | <a href="http://25.media.tumblr.com/tumblr_lzzktm0iF01qga09po1_500.jpg">http://25.media.tumblr.com/tumblr_lzzktm0iF01qga09po1_500.jpg</a>                                                                                                                                                                                                       |

|                          |                       |                  |                                                                                                                                                                                                                                                                                                   |
|--------------------------|-----------------------|------------------|---------------------------------------------------------------------------------------------------------------------------------------------------------------------------------------------------------------------------------------------------------------------------------------------------|
| <i>Eupleridae</i>        | Fossa                 | Yes, there's fur | <a href="http://photos.zoochat.com/large/fossa_sandwich_30th_april_2011-143698.jpg">http://photos.zoochat.com/large/fossa_sandwich_30th_april_2011-143698.jpg</a>                                                                                                                                 |
| <i>Felidae</i>           | Tiger                 | Yes, there's fur | <a href="http://i25.photobucket.com/albums/c59/telyse3/351Tiger_Eyesx.jpg">http://i25.photobucket.com/albums/c59/telyse3/351Tiger_Eyesx.jpg</a>                                                                                                                                                   |
| <i>Furipteridae</i>      | Smokey Bat            | Yes, there's fur | <a href="http://www.milbourne.net/HOSTEDSITES/blagdonlakebirds/Assets/myimages/1DS14052%20Whiskered%20Bat,%20Butcombe%20Bank,%20Blagdon%20Lake.JPG">http://www.milbourne.net/HOSTEDSITES/blagdonlakebirds/Assets/myimages/1DS14052%20Whiskered%20Bat,%20Butcombe%20Bank,%20Blagdon%20Lake.JPG</a> |
| <i>Galagidae</i>         | Bushbabies            | Yes, there's fur | <a href="http://www.animalpictures123.org/wp-content/uploads/2012/06/Demidoffs-Bush-Baby.jpg">http://www.animalpictures123.org/wp-content/uploads/2012/06/Demidoffs-Bush-Baby.jpg</a>                                                                                                             |
| <i>Geomyidae</i>         | Pocket gophers        | Yes, there's fur | <a href="http://farm6.staticflickr.com/5110/5597131228_80ee407e6f_o.jpg">http://farm6.staticflickr.com/5110/5597131228_80ee407e6f_o.jpg</a>                                                                                                                                                       |
| <i>Gliridae</i>          | Dormouse              | Yes, there's fur | <a href="http://www.devon.gov.uk/dormouse.jpg">http://www.devon.gov.uk/dormouse.jpg</a>                                                                                                                                                                                                           |
| <i>Heteromyidae</i>      | Kangaroo rats         | Yes, there's fur | <a href="http://rmb.org/v3/Portals/0/Images/Blog%20feature%20stories/12-10-17%20Ord's%20Kangaroo%20Rat.jpg">http://rmb.org/v3/Portals/0/Images/Blog%20feature%20stories/12-10-17%20Ord's%20Kangaroo%20Rat.jpg</a>                                                                                 |
| <i>Hystricidae</i>       | Old World porcupine   | Yes, there's fur | <a href="http://www.redorbit.com/media/uploads/2004/10/42_90863616636d8791fbfc212cda649d5f.jpg">http://www.redorbit.com/media/uploads/2004/10/42_90863616636d8791fbfc212cda649d5f.jpg</a>                                                                                                         |
| <i>Indriidae</i>         | Four Toothed Lemur    | Yes, there's fur | <a href="http://en.academic.ru/pictures/enwiki/83/Sifaka_in_Madagascar.jpg">http://en.academic.ru/pictures/enwiki/83/Sifaka_in_Madagascar.jpg</a>                                                                                                                                                 |
| <i>Lorisidae</i>         | Loris                 | Yes, there's fur | <a href="http://en.wikipedia.org/wiki/Slow_loris#mediaviewer/File:Slow_Loris_Female.jpg">http://en.wikipedia.org/wiki/Slow_loris#mediaviewer/File:Slow_Loris_Female.jpg</a>                                                                                                                       |
| <i>Megalonychidae</i>    | Two toed sloths       | Yes, there's fur | <a href="http://upload.wikimedia.org/wikipedia/commons/b/b1/Two_toed_sloth.JPG">http://upload.wikimedia.org/wikipedia/commons/b/b1/Two_toed_sloth.JPG</a>                                                                                                                                         |
| <i>Mormoopidae</i>       | Ghost Faced bat       | Yes, there's fur | <a href="http://farm3.staticflickr.com/2166/1777987598_4ea13ab227_o.jpg">http://farm3.staticflickr.com/2166/1777987598_4ea13ab227_o.jpg</a>                                                                                                                                                       |
| <i>Muridae</i>           | True mice             | Yes, there's fur | <a href="http://www.warrenphotographic.co.uk/photography/bigs/34248-Baby-yellow-necked-mice-white-background.jpg">http://www.warrenphotographic.co.uk/photography/bigs/34248-Baby-yellow-necked-mice-white-background.jpg</a>                                                                     |
| <i>Mustelidae</i>        | Weasel                | Yes, there's fur | <a href="http://pophaydn.files.wordpress.com/2011/11/weasel-credit-karen-white-resize.jpg">http://pophaydn.files.wordpress.com/2011/11/weasel-credit-karen-white-resize.jpg</a>                                                                                                                   |
| <i>Myocastoridae</i>     | Coypu                 | Yes, there's fur | <a href="http://1.bp.blogspot.com/_PwaTKtg0CtY/TBv1xGgvPMI/AAAAAABnk/QktLGs8wWtY/s1600/Myocastor_Coypus_Nutria_Biberratte.jpg">http://1.bp.blogspot.com/_PwaTKtg0CtY/TBv1xGgvPMI/AAAAAABnk/QktLGs8wWtY/s1600/Myocastor_Coypus_Nutria_Biberratte.jpg</a>                                           |
| <i>Nandiniidae</i>       | African palm civet    | Yes, there's fur | <a href="http://www.biodiversityexplorer.org/mammals/carnivora/images/s/5108450362_22e3e68b8d_658w.jpg">http://www.biodiversityexplorer.org/mammals/carnivora/images/s/5108450362_22e3e68b8d_658w.jpg</a>                                                                                         |
| <i>Ochotonidae</i>       | Pika                  | Yes, there's fur | <a href="http://florafaunafungi.com/wp-content/uploads/2012/09/American-Pika-Ochotona-princeps.jpg">http://florafaunafungi.com/wp-content/uploads/2012/09/American-Pika-Ochotona-princeps.jpg</a>                                                                                                 |
| <i>Octodontidae</i>      | Degu                  | Yes, there's fur | <a href="http://3.bp.blogspot.com/_nO36AMjqojc/TU7HwPLiEKI/AAAAAAAWI/sF5w2QeKkX4/s1600/daily+degu201.jpg">http://3.bp.blogspot.com/_nO36AMjqojc/TU7HwPLiEKI/AAAAAAAWI/sF5w2QeKkX4/s1600/daily+degu201.jpg</a>                                                                                     |
| <i>Otariidae</i>         | Eared seal            | Yes, there's fur | <a href="http://farm4.staticflickr.com/3514/5736446255_732cb5e54f_o.jpg">http://farm4.staticflickr.com/3514/5736446255_732cb5e54f_o.jpg</a>                                                                                                                                                       |
| <i>Pedetidae</i>         | Springhare            | Yes, there's fur | <a href="http://media.web.britannica.com/eb-media/00/4400-050-AE078316.jpg">http://media.web.britannica.com/eb-media/00/4400-050-AE078316.jpg</a>                                                                                                                                                 |
| <i>Petromuridae</i>      | Dassie rat            | Yes, there's fur | <a href="http://focusingonwildlife.com/news/wp-content/uploads/2012/05/Hyrax-Rock-Erongo-Mountains-Namibia-AR-37.jpg">http://focusingonwildlife.com/news/wp-content/uploads/2012/05/Hyrax-Rock-Erongo-Mountains-Namibia-AR-37.jpg</a>                                                             |
| <i>Phocidae</i>          | True seal             | Yes, there's fur | <a href="http://en.academic.ru/pictures/enwiki/83/Seehund.jpg">http://en.academic.ru/pictures/enwiki/83/Seehund.jpg</a>                                                                                                                                                                           |
| <i>Platacanthomyidae</i> | Chinese pygmy dormice | Yes, there's fur | <a href="http://i263.photobucket.com/albums/ii135/jackieandarchie/IMG_3765.jpg">http://i263.photobucket.com/albums/ii135/jackieandarchie/IMG_3765.jpg</a>                                                                                                                                         |
| <i>Procaviidae</i>       | Lyrax                 | Yes, there's fur | <a href="http://upload.wikimedia.org/wikipedia/commons/0/0c/Yellow-spotted_Rock_Hyrax.jpg">http://upload.wikimedia.org/wikipedia/commons/0/0c/Yellow-spotted_Rock_Hyrax.jpg</a>                                                                                                                   |

|                         |                             |                                                                                |                                                                                                                                                                                                                                                                                                                         |
|-------------------------|-----------------------------|--------------------------------------------------------------------------------|-------------------------------------------------------------------------------------------------------------------------------------------------------------------------------------------------------------------------------------------------------------------------------------------------------------------------|
| <i>Pteropodidae</i>     | Fruit bat                   | Yes, there's fur                                                               | <a href="http://sprudge.com/wp-content/uploads/2011/08/fruitbatespresso.jpg">http://sprudge.com/wp-content/uploads/2011/08/fruitbatespresso.jpg</a>                                                                                                                                                                     |
| <i>Rhinolophidae</i>    | Horseshoe bats              | Yes, there's fur                                                               | <a href="http://3.bp.blogspot.com/-dd6EtcfbzUo/TqRR234utPI/AAAAAAAAAAd4/AD7FPxJPF_g/s1600/Horseshoe+Bat-1.jpg">http://3.bp.blogspot.com/-dd6EtcfbzUo/TqRR234utPI/AAAAAAAAAAd4/AD7FPxJPF_g/s1600/Horseshoe+Bat-1.jpg</a>                                                                                                 |
| <i>Spalacidae</i>       | Lesser bamboo Rat           | Yes, there's fur                                                               | <a href="http://www.biolib.cz/IMG/GAL/BIG/152440.jpg">http://www.biolib.cz/IMG/GAL/BIG/152440.jpg</a>                                                                                                                                                                                                                   |
| <i>Tupaiaidae</i>       | Treeshrew                   | Yes, there's fur                                                               | <a href="http://www.raskbb.com/sybilsden/viewtopic.php?f=18&amp;t=8893">http://www.raskbb.com/sybilsden/viewtopic.php?f=18&amp;t=8893</a>                                                                                                                                                                               |
| <i>Ursidae</i>          | Polar Bear                  | Yes, there's fur                                                               | <a href="http://upload.wikimedia.org/wikipedia/commons/f/f8/Polar_Bear_0319_-_23-11-06.jpg">http://upload.wikimedia.org/wikipedia/commons/f/f8/Polar_Bear_0319_-_23-11-06.jpg</a>                                                                                                                                       |
| <i>Vespertilionidae</i> | Evening bat                 | Yes, there's fur                                                               | <a href="http://1.bp.blogspot.com/-6ZbPk-OgWQ/TIRRIOgahLI/AAAAAAAAAW0/ret6PKURzco/s1600/CHOMEX.jpg">http://1.bp.blogspot.com/-6ZbPk-OgWQ/TIRRIOgahLI/AAAAAAAAAW0/ret6PKURzco/s1600/CHOMEX.jpg</a>                                                                                                                       |
| <i>Viverridae</i>       | Palm Civet                  | Yes, there's fur                                                               | <a href="http://farm4.staticflickr.com/3024/2740021247_a5fea844d8_o.jpg">http://farm4.staticflickr.com/3024/2740021247_a5fea844d8_o.jpg</a>                                                                                                                                                                             |
| <i>Procyonidae</i>      | Raccoon                     | Yes, there's fur                                                               | <a href="http://www.listofimages.com/wp-content/uploads/2012/07/raccoon-tongue-animals.jpg">http://www.listofimages.com/wp-content/uploads/2012/07/raccoon-tongue-animals.jpg</a>                                                                                                                                       |
| <i>Ailuridae</i>        | Red Panda                   | Yes, see right eye                                                             | <a href="http://www.bhmpics.com/download/red_panda_face-1600x900.jpg">http://www.bhmpics.com/download/red_panda_face-1600x900.jpg</a>                                                                                                                                                                                   |
| <i>Hyaenidae</i>        | Hyena                       | Yes, See left Eye                                                              | <a href="http://www.wilkinsonsworld.com/wp-content/gallery/july-2010/200250-spotted-hyena-kruger-park-30082010.jpg">http://www.wilkinsonsworld.com/wp-content/gallery/july-2010/200250-spotted-hyena-kruger-park-30082010.jpg</a>                                                                                       |
| <i>Bovidae</i>          | Bovid (Cows, etc.)          | Yes (Possible, they are also in the same infraorder as the pronghorn (Pecora)) | <a href="http://us.123rf.com/400wm/400/400/jaromir/jaromir1207/jaromir120700038/14322309-wild-asiatic-abok--class-mammals-order-artiodactyla-family-bovid.jpg">http://us.123rf.com/400wm/400/400/jaromir/jaromir1207/jaromir120700038/14322309-wild-asiatic-abok--class-mammals-order-artiodactyla-family-bovid.jpg</a> |
| <i>Cercopithecidae</i>  | Baboons (Old world Monkeys) | Yes                                                                            | <a href="http://farm5.staticflickr.com/4002/4423792925_69058de3b8_z.jpg?zz=1">http://farm5.staticflickr.com/4002/4423792925_69058de3b8_z.jpg?zz=1</a>                                                                                                                                                                   |
| <i>Mephitidae</i>       | Skunk                       | Yes                                                                            | <a href="http://images.pictureshant.com/pics/s/skunk-8832.JPG">http://images.pictureshant.com/pics/s/skunk-8832.JPG</a>                                                                                                                                                                                                 |
| <i>Agoutidae</i>        | Paca (Cuniculous)           | Yes                                                                            | <a href="http://photos.zoochat.com/large/lowland_paca_cuniculus_paca-202312.jpg">http://photos.zoochat.com/large/lowland_paca_cuniculus_paca-202312.jpg</a>                                                                                                                                                             |
| <i>Antilocapridae</i>   | Pronghorn                   | Yes                                                                            | <a href="http://upload.wikimedia.org/wikipedia/commons/b/b5/Pronghorn.jpg">http://upload.wikimedia.org/wikipedia/commons/b/b5/Pronghorn.jpg</a>                                                                                                                                                                         |
| <i>Calomyscidae</i>     | Mouse-like hamster          | Yes                                                                            | <a href="http://farm3.staticflickr.com/2531/4126011746_72b7a56892_o.jpg">http://farm3.staticflickr.com/2531/4126011746_72b7a56892_o.jpg</a>                                                                                                                                                                             |
| <i>Camelidae</i>        | Camels                      | Yes                                                                            | <a href="http://i1.treknature.com/photos/2840/camel_eye1.jpg">http://i1.treknature.com/photos/2840/camel_eye1.jpg</a>                                                                                                                                                                                                   |
| <i>Capromyidae</i>      | Hutia                       | Yes                                                                            | <a href="http://bybio.files.wordpress.com/2013/04/cuban-hutia.jpg">http://bybio.files.wordpress.com/2013/04/cuban-hutia.jpg</a>                                                                                                                                                                                         |
| <i>Didelphidae</i>      | Opossum                     | Yes                                                                            | see zoo pic                                                                                                                                                                                                                                                                                                             |
| <i>Elephantidae</i>     | Elephants                   | Yes                                                                            | <a href="http://www.clarioncallnews.com/wp-content/uploads/2011/10/elephant-eye.jpg">http://www.clarioncallnews.com/wp-content/uploads/2011/10/elephant-eye.jpg</a>                                                                                                                                                     |
| <i>Equidae</i>          | Horses                      | Yes                                                                            | <a href="http://upload.wikimedia.org/wikipedia/commons/f/f9/Horse_eye_5196.jpg">http://upload.wikimedia.org/wikipedia/commons/f/f9/Horse_eye_5196.jpg</a>                                                                                                                                                               |
| <i>Giraffidae</i>       | Giraffe                     | Yes                                                                            | <a href="http://www.birdwatchersdigest.com/blog/uploaded_images/GiraffeEye-732728.jpg">http://www.birdwatchersdigest.com/blog/uploaded_images/GiraffeEye-732728.jpg</a>                                                                                                                                                 |
| <i>Herpestidae</i>      | Mongoose                    | Yes                                                                            | <a href="http://www.wallpaperstop.co/wallpapers/2013/03/Mongoose-Eyes-485x728.jpg">http://www.wallpaperstop.co/wallpapers/2013/03/Mongoose-Eyes-485x728.jpg</a>                                                                                                                                                         |
| <i>Hominidae</i>        | Chimpanzee                  | Yes                                                                            | <a href="http://media.theiapolis.com/d4/hTC/i1ND7/k2/11AS/w1HC/chimpanzee.jpg">http://media.theiapolis.com/d4/hTC/i1ND7/k2/11AS/w1HC/chimpanzee.jpg</a>                                                                                                                                                                 |
| <i>Leporidae</i>        | Rabbit                      | Yes                                                                            | <a href="http://images.fineartamerica.com/images-medium-large/rabbit-eye-close-up-deniece-platt.jpg">http://images.fineartamerica.com/images-medium-large/rabbit-eye-close-up-deniece-platt.jpg</a>                                                                                                                     |
| <i>Moschidae</i>        | Musk deer                   | Yes                                                                            | <a href="http://photos.zoochat.com/large/dscf9857-8012.jpg">http://photos.zoochat.com/large/dscf9857-8012.jpg</a>                                                                                                                                                                                                       |
| <i>Nesomyidae</i>       | Malagasy rats               | Yes                                                                            | <a href="http://www.biolib.cz/IMG/GAL/BIG/178518.jpg">http://www.biolib.cz/IMG/GAL/BIG/178518.jpg</a>                                                                                                                                                                                                                   |
| <i>Rhinocerotidae</i>   | Rhinoceros                  | Yes                                                                            | <a href="http://www.pbase.com/budohio/image/111103071/original.jpg">http://www.pbase.com/budohio/image/111103071/original.jpg</a>                                                                                                                                                                                       |



|                        |                                                |                                               |                                                                                                                                                                                                                                                                                                                                                                                                                                                                                                                                                                                                                                                                              |
|------------------------|------------------------------------------------|-----------------------------------------------|------------------------------------------------------------------------------------------------------------------------------------------------------------------------------------------------------------------------------------------------------------------------------------------------------------------------------------------------------------------------------------------------------------------------------------------------------------------------------------------------------------------------------------------------------------------------------------------------------------------------------------------------------------------------------|
| <i>Suidae</i>          | Pigs                                           | Yes                                           | <a href="http://timgarratt.files.wordpress.com/2009/12/pig_1.jpg">http://timgarratt.files.wordpress.com/2009/12/pig_1.jpg</a>                                                                                                                                                                                                                                                                                                                                                                                                                                                                                                                                                |
| <i>Tayassuidae</i>     | Peccary                                        | Yes                                           | <a href="http://upload.wikimedia.org/wikipedia/commons/5/5b/Collared_peccary_Pecari_tajacu.jpg">http://upload.wikimedia.org/wikipedia/commons/5/5b/Collared_peccary_Pecari_tajacu.jpg</a>                                                                                                                                                                                                                                                                                                                                                                                                                                                                                    |
| <i>Tragulidae</i>      | Mouse-deer                                     | yes                                           | <a href="http://www.acuteaday.com/blog/wp-content/uploads/2012/10/baby-chevrotain-mouse-deer.jpeg">http://www.acuteaday.com/blog/wp-content/uploads/2012/10/baby-chevrotain-mouse-deer.jpeg</a>                                                                                                                                                                                                                                                                                                                                                                                                                                                                              |
| <i>Macropodidae</i>    | Red kangaroo                                   | yes                                           | see zoo pictures                                                                                                                                                                                                                                                                                                                                                                                                                                                                                                                                                                                                                                                             |
| <i>Macroscelididae</i> | Elephant shrews                                | Yes                                           | part of our data                                                                                                                                                                                                                                                                                                                                                                                                                                                                                                                                                                                                                                                             |
| <i>Cervidae</i>        | White-tailed deer                              | Yes                                           | <a href="http://stevecreek.com/wp-content/uploads/2010/08/Deer_100808_4411.jpg">http://stevecreek.com/wp-content/uploads/2010/08/Deer_100808_4411.jpg</a>                                                                                                                                                                                                                                                                                                                                                                                                                                                                                                                    |
| <i>Cheirogaleidae</i>  | Lemur                                          | Yes                                           | <a href="http://farm7.staticflickr.com/6148/6039529714_45e2e7d279_z.jpg">http://farm7.staticflickr.com/6148/6039529714_45e2e7d279_z.jpg</a>                                                                                                                                                                                                                                                                                                                                                                                                                                                                                                                                  |
| <i>Erethizontidae</i>  | New World porcupines                           | Yes                                           | <a href="http://www.biolib.cz/IMG/GAL/BIG/38102.jpg">http://www.biolib.cz/IMG/GAL/BIG/38102.jpg</a>                                                                                                                                                                                                                                                                                                                                                                                                                                                                                                                                                                          |
| <i>Lemuridae</i>       | Lemurid                                        | Yes                                           | <a href="http://upload.wikimedia.org/wikipedia/commons/a/ac/Eulemur_mongoz_%28male_-_face%29.jpg">http://upload.wikimedia.org/wikipedia/commons/a/ac/Eulemur_mongoz_%28male_-_face%29.jpg</a>                                                                                                                                                                                                                                                                                                                                                                                                                                                                                |
| <i>Soricidae</i>       | Shrew                                          | Yes                                           | <a href="http://newsdesk.si.edu/sites/default/files/photos/National%20Zoo%20Elephant%20Shrew.jpg">http://newsdesk.si.edu/sites/default/files/photos/National%20Zoo%20Elephant%20Shrew.jpg</a>                                                                                                                                                                                                                                                                                                                                                                                                                                                                                |
| <i>Tapiridae</i>       | Tapir                                          | Yes                                           | <a href="http://photos.zoochat.com/large/malayan_tapir_ed_20_10_2009-105636.jpg">http://photos.zoochat.com/large/malayan_tapir_ed_20_10_2009-105636.jpg</a>                                                                                                                                                                                                                                                                                                                                                                                                                                                                                                                  |
| <i>Tarsiidae</i>       | Tarsiers                                       | Yes                                           | <a href="http://blogs.scientificamerican.com/observations/files/2012/02/tarsier.jpg">http://blogs.scientificamerican.com/observations/files/2012/02/tarsier.jpg</a>                                                                                                                                                                                                                                                                                                                                                                                                                                                                                                          |
| <i>Canidae</i>         | Domestic dogs, wolves, foxes, jackals, coyotes | Wolf: Small top lid lashes appear visible     | <a href="http://farm4.static.flickr.com/3342/3434820536_f9bf73da9e.jpg">http://farm4.static.flickr.com/3342/3434820536_f9bf73da9e.jpg</a><br><a href="http://4.bp.blogspot.com/-NFVoxpmueq0/T1_MRSm5KQI/AAAAAAAAAFQ/YT0es_ORbag/s1600/081223Glacier-2.jpg">http://4.bp.blogspot.com/-NFVoxpmueq0/T1_MRSm5KQI/AAAAAAAAAFQ/YT0es_ORbag/s1600/081223Glacier-2.jpg</a><br><a href="http://darkroom.danielyeow.com/wp-content/uploads/20100523-DSC_5557.jpg">http://darkroom.danielyeow.com/wp-content/uploads/20100523-DSC_5557.jpg</a><br><a href="http://www.notempire.com/images/uploads/Untitled-1-2509.jpg">http://www.notempire.com/images/uploads/Untitled-1-2509.jpg</a> |
| <i>Chrysochloridae</i> | Golden moles                                   | Non Functional Eyes covered with skin and fur | <a href="http://www.wfft.org/wp-content/uploads/2012/11/cosmo.jpg">http://www.wfft.org/wp-content/uploads/2012/11/cosmo.jpg</a>                                                                                                                                                                                                                                                                                                                                                                                                                                                                                                                                              |
| <i>Hylobatidae</i>     | Gibbon                                         | No, have hairs on top but no bottom           | <a href="http://www.wfft.org/wp-content/uploads/2012/11/cosmo.jpg">http://www.wfft.org/wp-content/uploads/2012/11/cosmo.jpg</a>                                                                                                                                                                                                                                                                                                                                                                                                                                                                                                                                              |
| <i>Anomaluridae</i>    | Scaly-tailed squirrels                         | No, fur isn't right around eye                | <a href="http://www.terminatorbrooklyn.com/large_image/squirrel/squirrel4.jpg">http://www.terminatorbrooklyn.com/large_image/squirrel/squirrel4.jpg</a>                                                                                                                                                                                                                                                                                                                                                                                                                                                                                                                      |
| <i>Bradypodidae</i>    | Three-toed sloths                              | No, fur isn't right around eye                | <a href="http://farm9.staticflickr.com/8373/8474996578_2a77443dc6_b.jpg">http://farm9.staticflickr.com/8373/8474996578_2a77443dc6_b.jpg</a>                                                                                                                                                                                                                                                                                                                                                                                                                                                                                                                                  |
| <i>Myrmecophagidae</i> | Giant anteater                                 | No, fur isn't right around eye                | <a href="http://animal-backgrounds.com/files/Anteater/Giant_Anteater-desktop-wallpaper.jpg">http://animal-backgrounds.com/files/Anteater/Giant_Anteater-desktop-wallpaper.jpg</a>                                                                                                                                                                                                                                                                                                                                                                                                                                                                                            |
| <i>Myzopodidae</i>     | Madagascar Sucker-footed Bat                   | No, fur isn't right around eye                | <a href="http://images.nationalgeographic.com/wpf/media-live/photos/000/107/cache/upright-roosting-bat_10789_600x450.jpg">http://images.nationalgeographic.com/wpf/media-live/photos/000/107/cache/upright-roosting-bat_10789_600x450.jpg</a>                                                                                                                                                                                                                                                                                                                                                                                                                                |
| <i>Natalidae</i>       | Funnel-eared bats                              | No, fur isn't right around eye                | <a href="http://farm9.staticflickr.com/8033/7953195746_f28ea4117e_z.jpg">http://farm9.staticflickr.com/8033/7953195746_f28ea4117e_z.jpg</a>                                                                                                                                                                                                                                                                                                                                                                                                                                                                                                                                  |
| <i>Thyropteridae</i>   | Peter's disk-winged bat                        | No, does not appear so                        | <a href="http://farm4.static.flickr.com/3085/5724136173_7980c3efac.jpg">http://farm4.static.flickr.com/3085/5724136173_7980c3efac.jpg</a>                                                                                                                                                                                                                                                                                                                                                                                                                                                                                                                                    |
| <i>Balaenidae</i>      | Right whales                                   | No, does not appear so                        | <a href="http://www.whaleman.org/sites/default/files/gray%20whale%20eye.jpg">http://www.whaleman.org/sites/default/files/gray%20whale%20eye.jpg</a>                                                                                                                                                                                                                                                                                                                                                                                                                                                                                                                          |
| <i>Balaenopteridae</i> | Baleen whales                                  | No, does not appear so                        | <a href="http://i.images.cdn.fotopedia.com/NvT_IbC6noA-wRZJpnlD6oI-hd/World_Heritage_Sites/America/North_America/Mexico/Islands_and_Protected_Areas_of_the_Gulf_of_California/El_Vizcaino_Biosphere_Reserve/El_Vizcaino_Biosphere_Reserve-Baleen_whale-Cetacea-Eschrichtiidae-Eye-Gray_whale.jpg">http://i.images.cdn.fotopedia.com/NvT_IbC6noA-wRZJpnlD6oI-hd/World_Heritage_Sites/America/North_America/Mexico/Islands_and_Protected_Areas_of_the_Gulf_of_California/El_Vizcaino_Biosphere_Reserve/El_Vizcaino_Biosphere_Reserve-Baleen_whale-Cetacea-Eschrichtiidae-Eye-Gray_whale.jpg</a>                                                                                |

|                         |                                       |                        |                                                                                                                                                                                                                                                                                                     |
|-------------------------|---------------------------------------|------------------------|-----------------------------------------------------------------------------------------------------------------------------------------------------------------------------------------------------------------------------------------------------------------------------------------------------|
| <i>Orycteropodidae</i>  | Aardvark                              | No, does not appear so | <a href="http://parrotnation.files.wordpress.com/2008/09/dscn0050.jpg">http://parrotnation.files.wordpress.com/2008/09/dscn0050.jpg</a>                                                                                                                                                             |
| <i>Phocoenidae</i>      | Harbour porpoise                      | No, does not appear so | <a href="http://photos.zoochat.com/large/dscf14002-61511.jpg">http://photos.zoochat.com/large/dscf14002-61511.jpg</a>                                                                                                                                                                               |
| <i>Pontoporiidae</i>    | La Plata dolphin                      | No, does not appear so | <a href="http://www.wdcs.org/graphics_bin/franciscana_dolphin.jpg">http://www.wdcs.org/graphics_bin/franciscana_dolphin.jpg</a>                                                                                                                                                                     |
| <i>Megadermatidae</i>   | False Vampire Bats                    | No, does not appear so | <a href="http://farm7.staticflickr.com/6198/6129869755_bbf36f447f_z.jpg">http://farm7.staticflickr.com/6198/6129869755_bbf36f447f_z.jpg</a>                                                                                                                                                         |
| <i>Molossidae</i>       | Mastiff bat                           | No, does not appear so | <a href="http://lh3.ggpht.com/-OR8B7jll6HmlaYLwbZOhBYxZmER71Lq-Z_BpCZhCGxVHLV-hSBFFD8c-aKyw5HGckR0-XnCVFqa0TTBVu8=s1200">http://lh3.ggpht.com/-OR8B7jll6HmlaYLwbZOhBYxZmER71Lq-Z_BpCZhCGxVHLV-hSBFFD8c-aKyw5HGckR0-XnCVFqa0TTBVu8=s1200</a>                                                         |
| <i>Mystacinidae</i>     | New Zealand short-tailed bats         | No, does not appear so | <a href="http://static.stuff.co.nz/1339481427/480/7090480.jpg">http://static.stuff.co.nz/1339481427/480/7090480.jpg</a>                                                                                                                                                                             |
| <i>Noctilionidae</i>    | Bulldog bat                           | No, does not appear so | <a href="http://onemoregeneration.org/wp-content/uploads/2011/03/OMG-Trivia-03-04-11.jpg.png">http://onemoregeneration.org/wp-content/uploads/2011/03/OMG-Trivia-03-04-11.jpg.png</a>                                                                                                               |
| <i>Ptilocercidae</i>    | Pen-tailed tree-shrew                 | No, does not appear so | <a href="http://www.eversostrange.com/wp-content/uploads/2011/04/treeshrew.jpg">http://www.eversostrange.com/wp-content/uploads/2011/04/treeshrew.jpg</a>                                                                                                                                           |
| <i>Rhinopomatidae</i>   | Mouse-tailed bats                     | No, does not appear so | <a href="http://farm5.staticflickr.com/4140/4779800962_26724b8f41_b.jpg">http://farm5.staticflickr.com/4140/4779800962_26724b8f41_b.jpg</a>                                                                                                                                                         |
| <i>Sciuridae</i>        | Squirrel                              | No, does not appear so | <a href="http://2.bp.blogspot.com/-2FnpfRh2vkw/ThE6G_JEtXl/AAAAAAAAApw/h_RfA4QvVI8/s1600/squirrel-jp.jpg">http://2.bp.blogspot.com/-2FnpfRh2vkw/ThE6G_JEtXl/AAAAAAAAApw/h_RfA4QvVI8/s1600/squirrel-jp.jpg</a>                                                                                       |
| <i>Talpidae</i>         | Moles                                 | No eyes                | <a href="http://upload.wikimedia.org/wikipedia/commons/e/ed/Talpa_europaea_MHNT.jpg">http://upload.wikimedia.org/wikipedia/commons/e/ed/Talpa_europaea_MHNT.jpg</a>                                                                                                                                 |
| <i>Bathyergidae</i>     | Mole rat                              | No                     | <a href="http://blog.synthesis.net/wp-content/uploads/2008/06/naked-mole-rat.jpg">http://blog.synthesis.net/wp-content/uploads/2008/06/naked-mole-rat.jpg</a>                                                                                                                                       |
| <i>Cebidae</i>          | capuchin monkeys and squirrel monkeys | No                     | <a href="http://farm8.staticflickr.com/7166/6601629505_db87d04eed_b.jpg">http://farm8.staticflickr.com/7166/6601629505_db87d04eed_b.jpg</a>                                                                                                                                                         |
| <i>Craseonycteridae</i> | Kitti's hog-nosed bat                 | No                     | <a href="http://www.edgeofexistence.org/edgeblog/wp-content/uploads/2008/03/bumblebee-bat2.jpg">http://www.edgeofexistence.org/edgeblog/wp-content/uploads/2008/03/bumblebee-bat2.jpg</a>                                                                                                           |
| <i>Dasypodidae</i>      | Armadillos                            | No                     | <a href="http://farm1.static.flickr.com/23/29730072_8d8fea5fc2.jpg">http://farm1.static.flickr.com/23/29730072_8d8fea5fc2.jpg</a>                                                                                                                                                                   |
| <i>Delphinidae</i>      | Oceanic dolphins                      | No                     | <a href="http://th09.deviantart.net/fs49/PRE/f/2009/236/6/5/659ecc549c46669a5fac7e0b8755daf6.png">http://th09.deviantart.net/fs49/PRE/f/2009/236/6/5/659ecc549c46669a5fac7e0b8755daf6.png</a>                                                                                                       |
| <i>Dugongidae</i>       | Dugong                                | No                     | <a href="http://cdn1.arkive.org/media/0E/0E280C5A-D487-4420-9C98-8ED7F0D38A21/Presentation.Large/Dugong-eye-detail.jpg">http://cdn1.arkive.org/media/0E/0E280C5A-D487-4420-9C98-8ED7F0D38A21/Presentation.Large/Dugong-eye-detail.jpg</a>                                                           |
| <i>Erinaceidae</i>      | Hedgehog                              | No                     | <a href="http://www.mrwallpaper.com/wallpapers/Cute-Hedgehog.jpg">http://www.mrwallpaper.com/wallpapers/Cute-Hedgehog.jpg</a>                                                                                                                                                                       |
| <i>Hippopotamidae</i>   | Hippopotamuses                        | No                     | <a href="http://farm6.staticflickr.com/5063/5628746490_d4d06f6de8_z.jpg">http://farm6.staticflickr.com/5063/5628746490_d4d06f6de8_z.jpg</a>                                                                                                                                                         |
| <i>Hyperoodontidae</i>  | Beaked whale (Ziphiidae)              | No                     | No good evidence                                                                                                                                                                                                                                                                                    |
| <i>Iniidae</i>          | River dolphins                        | No                     | <a href="http://assets.worldwildlife.org/photos/3577/images/story_full_width/amazon_river_dolphin_naturepl.com_tood_pusser_wwf_canon.JPG?1360265162">http://assets.worldwildlife.org/photos/3577/images/story_full_width/amazon_river_dolphin_naturepl.com_tood_pusser_wwf_canon.JPG?1360265162</a> |
| <i>Lepilemuridae</i>    | Lepilemur                             | No                     | <a href="http://upload.wikimedia.org/wikipedia/commons/7/77/Lepilemur_edwardsi.jpg">http://upload.wikimedia.org/wikipedia/commons/7/77/Lepilemur_edwardsi.jpg</a>                                                                                                                                   |
| <i>Manidae</i>          | Pangolin                              | No                     | <a href="http://3.bp.blogspot.com/_wLdWNe857CQ/Tct21C690II/AAAAAAAFa/L4MNqBa2VyE/s1600/25.jpg">http://3.bp.blogspot.com/_wLdWNe857CQ/Tct21C690II/AAAAAAAFa/L4MNqBa2VyE/s1600/25.jpg</a>                                                                                                             |
| <i>Monodontidae</i>     | Beluga Whale                          | No                     | <a href="http://demos.ithemes.com/kepler-light/files/2011/08/Hello-Inuk_23648529_m.jpg">http://demos.ithemes.com/kepler-light/files/2011/08/Hello-Inuk_23648529_m.jpg</a>                                                                                                                           |
| <i>Odobenidae</i>       | Walrus                                | No                     | <a href="http://upload.wikimedia.org/wikipedia/commons/3/37/Walrus_-_Kamogawa_Seaworld_-_1.jpg">http://upload.wikimedia.org/wikipedia/commons/3/37/Walrus_-_Kamogawa_Seaworld_-_1.jpg</a>                                                                                                           |

|                         |                                                                        |         |                                                                                                                                                                                         |
|-------------------------|------------------------------------------------------------------------|---------|-----------------------------------------------------------------------------------------------------------------------------------------------------------------------------------------|
| <i>Physeteridae</i>     | Sperm whale                                                            | No      | <a href="http://www.amosphotography.com/data/photos/242_1sperm_w_hale_enigma__eye_upclose.jpg">http://www.amosphotography.com/data/photos/242_1sperm_w_hale_enigma__eye_upclose.jpg</a> |
| <i>Platanistidae</i>    | Ganges river dolphin                                                   | No      | <a href="http://img.docstoccdn.com/thumb/orig/79854493.png">http://img.docstoccdn.com/thumb/orig/79854493.png</a>                                                                       |
| <i>Trichechidae</i>     | Manatee                                                                | No      | <a href="http://barbarabockman.files.wordpress.com/2010/11/prose_1.jpg">http://barbarabockman.files.wordpress.com/2010/11/prose_1.jpg</a>                                               |
| <i>Tenrecidae</i>       | Tenrec                                                                 | No      | <a href="http://www.saczoo.org/view.image?Id=1221">http://www.saczoo.org/view.image?Id=1221</a>                                                                                         |
| <i>Lipotidae</i>        | Baiji Extinct (2006)                                                   | Extinct | Extinct                                                                                                                                                                                 |
| <i>Prorastomidae</i>    | Extinct (Ancient Manatee)                                              | Extinct | Extinct                                                                                                                                                                                 |
| <i>Protosirenidae</i>   | Extinct                                                                | Extinct | Extinct                                                                                                                                                                                 |
| <i>Cetotheriidae</i>    | Extinct (Possibly Ressurrecting the family with the Pygmy Right Whale) | Extinct | Extinct                                                                                                                                                                                 |
| <i>Enaliarctidae</i>    | Extinct                                                                | Extinct | Extinct                                                                                                                                                                                 |
| <i>Gomphotheriidae</i>  | Extinct                                                                | Extinct | Extinct                                                                                                                                                                                 |
| <i>Hemicyonidae</i>     | Extinct                                                                | Extinct | Extinct                                                                                                                                                                                 |
| <i>Hyopsodontidae</i>   | Extinct                                                                | Extinct | Extinct                                                                                                                                                                                 |
| <i>Lambdaotheriidae</i> | Extinct                                                                | Extinct | Extinct                                                                                                                                                                                 |
| <i>Nimravidae</i>       | Extinct (False Saber-tooth Cat)                                        | Extinct | Extinct                                                                                                                                                                                 |
| <i>Pelocetidae</i>      | Extinct (Ancient Baleen Whales)                                        | Extinct | Extinct                                                                                                                                                                                 |
| <i>Percrocutidae</i>    | Extinct (Hyena-like)                                                   | Extinct | Extinct                                                                                                                                                                                 |
| <i>Stenoplesictidae</i> | Extinct (civet-like animals)                                           | Extinct | Extinct                                                                                                                                                                                 |

| Proper Name (Family)          | Common Name (Example)      | Posses Traditional Eyelashes?                                                  | Photo                                                                                                                                                                                                                                                                                                                                                                                                                                                                                                                               |
|-------------------------------|----------------------------|--------------------------------------------------------------------------------|-------------------------------------------------------------------------------------------------------------------------------------------------------------------------------------------------------------------------------------------------------------------------------------------------------------------------------------------------------------------------------------------------------------------------------------------------------------------------------------------------------------------------------------|
| <u><i>Ailuridae</i></u>       | Red Panda                  | Yes, see right eye                                                             | <a href="http://www.bhmpics.com/download/red_panda_face-1600x900.jpg">http://www.bhmpics.com/download/red_panda_face-1600x900.jpg</a>                                                                                                                                                                                                                                                                                                                                                                                               |
| <u><i>Hyaenidae</i></u>       | Hyena                      | Yes, See left Eye                                                              | <a href="http://www.wilkinsonsworld.com/wp-content/gallery/july-2010/200250-spotted-hyena-kruger-park-30082010.jpg">http://www.wilkinsonsworld.com/wp-content/gallery/july-2010/200250-spotted-hyena-kruger-park-30082010.jpg</a>                                                                                                                                                                                                                                                                                                   |
| <u><i>Bovidae</i></u>         | Cow                        | Yes (Possible, they are also in the same infraorder as the pronghorn (Pecora)) | <a href="http://us.123rf.com/400wm/400/400/jaromir/jaromir1207/jaromir120700038/14322309-wild-asiatic-abok--class-mammals-order-artiodactyla-family-bovid.jpg">http://us.123rf.com/400wm/400/400/jaromir/jaromir1207/jaromir120700038/14322309-wild-asiatic-abok--class-mammals-order-artiodactyla-family-bovid.jpg</a>                                                                                                                                                                                                             |
| <u><i>Cercopithecidae</i></u> | Baboon (Old world Monkeys) | Yes                                                                            | <a href="http://farm5.staticflickr.com/4002/4423792925_69058de3b8_z.jpg?zz=1">http://farm5.staticflickr.com/4002/4423792925_69058de3b8_z.jpg?zz=1</a>                                                                                                                                                                                                                                                                                                                                                                               |
| <u><i>Agoutidae</i></u>       | Paca (Cuniculous)          | Yes                                                                            | <a href="http://photos.zoochat.com/large/lowland_paca_cunniculus_paca-202312.jpg">http://photos.zoochat.com/large/lowland_paca_cunniculus_paca-202312.jpg</a>                                                                                                                                                                                                                                                                                                                                                                       |
| <u><i>Antilocapridae</i></u>  | Pronghorn                  | Yes                                                                            | <a href="http://upload.wikimedia.org/wikipedia/commons/b/b5/Pronghorn.jpg">http://upload.wikimedia.org/wikipedia/commons/b/b5/Pronghorn.jpg</a>                                                                                                                                                                                                                                                                                                                                                                                     |
| <u><i>Calomyscidae</i></u>    | Mouse-like hamster         | Yes                                                                            | <a href="http://farm3.staticflickr.com/2531/4126011746_72b7a56892_o.jpg">http://farm3.staticflickr.com/2531/4126011746_72b7a56892_o.jpg</a>                                                                                                                                                                                                                                                                                                                                                                                         |
| <u><i>Camelidae</i></u>       | Camel                      | Yes                                                                            | <a href="http://i1.treknature.com/photos/2840/camel_eye1.jpg">http://i1.treknature.com/photos/2840/camel_eye1.jpg</a>                                                                                                                                                                                                                                                                                                                                                                                                               |
| <u><i>Capromyidae</i></u>     | Hutia                      | Yes                                                                            | <a href="http://bybio.files.wordpress.com/2013/04/cuban-hutia.jpg">http://bybio.files.wordpress.com/2013/04/cuban-hutia.jpg</a>                                                                                                                                                                                                                                                                                                                                                                                                     |
| <u><i>Didelphidae</i></u>     | Opossum                    | Yes                                                                            | see zoo picture                                                                                                                                                                                                                                                                                                                                                                                                                                                                                                                     |
| <u><i>Elephantidae</i></u>    | Elephant                   | Yes                                                                            | <a href="http://www.clarioncallnews.com/wp-content/uploads/2011/10/elephant-eye.jpg">http://www.clarioncallnews.com/wp-content/uploads/2011/10/elephant-eye.jpg</a>                                                                                                                                                                                                                                                                                                                                                                 |
| <u><i>Equidae</i></u>         | Horse                      | Yes                                                                            | <a href="http://upload.wikimedia.org/wikipedia/commons/f/f9/Horse_eye_5196.jpg">http://upload.wikimedia.org/wikipedia/commons/f/f9/Horse_eye_5196.jpg</a>                                                                                                                                                                                                                                                                                                                                                                           |
| <u><i>Giraffidae</i></u>      | Giraffe                    | Yes                                                                            | <a href="http://www.birdwatchersdigest.com/blog/uploaded_images/GiraffeEye-732728.jpg">http://www.birdwatchersdigest.com/blog/uploaded_images/GiraffeEye-732728.jpg</a>                                                                                                                                                                                                                                                                                                                                                             |
| <u><i>Herpestidae</i></u>     | Mongoose                   | Yes                                                                            | <a href="http://www.wallpaperstop.co/wallpapers/2013/03/Mongoose-Eyes-485x728.jpg">http://www.wallpaperstop.co/wallpapers/2013/03/Mongoose-Eyes-485x728.jpg</a>                                                                                                                                                                                                                                                                                                                                                                     |
| <u><i>Hominidae</i></u>       | Chimpanzee                 | Yes                                                                            | <a href="http://media.theiapolis.com/d4/hTC/i1ND7/k2/l1AS/w1HC/chimpanzee.jpg">http://media.theiapolis.com/d4/hTC/i1ND7/k2/l1AS/w1HC/chimpanzee.jpg</a>                                                                                                                                                                                                                                                                                                                                                                             |
| <u><i>Leporidae</i></u>       | Rabbit                     | Yes                                                                            | <a href="http://images.fineartamerica.com/images-medium-large/rabbit-eye-close-up-deniece-platt.jpg">http://images.fineartamerica.com/images-medium-large/rabbit-eye-close-up-deniece-platt.jpg</a>                                                                                                                                                                                                                                                                                                                                 |
| <u><i>Moschidae</i></u>       | Musk deer                  | Yes                                                                            | <a href="http://photos.zoochat.com/large/dscf9857-8012.jpg">http://photos.zoochat.com/large/dscf9857-8012.jpg</a>                                                                                                                                                                                                                                                                                                                                                                                                                   |
| <u><i>Nesomyidae</i></u>      | Malagasy rats              | Yes                                                                            | <a href="http://www.biolib.cz/IMG/GAL/BIG/178518.jpg">http://www.biolib.cz/IMG/GAL/BIG/178518.jpg</a>                                                                                                                                                                                                                                                                                                                                                                                                                               |
| <u><i>Rhinocerotidae</i></u>  | Rhinoceros                 | Yes                                                                            | <a href="http://www.pbase.com/budohio/image/111103071/original.jpg">http://www.pbase.com/budohio/image/111103071/original.jpg</a>                                                                                                                                                                                                                                                                                                                                                                                                   |
| <u><i>Suidae</i></u>          | Pig                        | Yes                                                                            | <a href="http://timgarratt.files.wordpress.com/2009/12/pig_1.jpg">http://timgarratt.files.wordpress.com/2009/12/pig_1.jpg</a>                                                                                                                                                                                                                                                                                                                                                                                                       |
| <u><i>Tayassuidae</i></u>     | Peccary                    | Yes                                                                            | <a href="http://upload.wikimedia.org/wikipedia/commons/5/5b/Collared_peccary_Pecari_tajacu.jpg">http://upload.wikimedia.org/wikipedia/commons/5/5b/Collared_peccary_Pecari_tajacu.jpg</a>                                                                                                                                                                                                                                                                                                                                           |
| <u><i>Traquididae</i></u>     | Mouse-deer                 | Yes                                                                            | <a href="http://www.acuteaday.com/blog/wp-content/uploads/2012/10/baby-chevrotain-mouse-deer.jpeg">http://www.acuteaday.com/blog/wp-content/uploads/2012/10/baby-chevrotain-mouse-deer.jpeg</a>                                                                                                                                                                                                                                                                                                                                     |
| <u><i>Macropodidae</i></u>    | Red kangaroo               | Yes                                                                            | see zoo picture                                                                                                                                                                                                                                                                                                                                                                                                                                                                                                                     |
| <u><i>Macroscelididae</i></u> | Elephant shrew             | Yes                                                                            | part of our data                                                                                                                                                                                                                                                                                                                                                                                                                                                                                                                    |
| <u><i>Cervidae</i></u>        | White-tailed deer          | Yes                                                                            | <a href="http://stevecreek.com/wp-content/uploads/2010/08/Deer_100808_4411.jpg">http://stevecreek.com/wp-content/uploads/2010/08/Deer_100808_4411.jpg</a>                                                                                                                                                                                                                                                                                                                                                                           |
| <u><i>Canidae</i></u>         | Wolf                       | Yes                                                                            | <a href="http://farm4.static.flickr.com/3342/3434820536_f9bf73da9e.jpg">http://farm4.static.flickr.com/3342/3434820536_f9bf73da9e.jpg</a><br><a href="http://4.bp.blogspot.com/-NFVoxpmueq0/T1_MRSm5KQI/AAAAAAAAAFQ/YT0es_ORbag/s1600/081223Glacier-2.jpg">http://4.bp.blogspot.com/-NFVoxpmueq0/T1_MRSm5KQI/AAAAAAAAAFQ/YT0es_ORbag/s1600/081223Glacier-2.jpg</a><br><a href="http://darkroom.danielyeow.com/wp-content/uploads/20100523-DSC_5557.jpg">http://darkroom.danielyeow.com/wp-content/uploads/20100523-DSC_5557.jpg</a> |
| -                             |                            |                                                                                |                                                                                                                                                                                                                                                                                                                                                                                                                                                                                                                                     |
| <u><i>Abrocomidae</i></u>     | Chinchilla rat             | Not Noticeable                                                                 | <a href="http://farm3.staticflickr.com/2458/3658723390_70176803dc_o.jpg">http://farm3.staticflickr.com/2458/3658723390_70176803dc_o.jpg</a>                                                                                                                                                                                                                                                                                                                                                                                         |
| <u><i>Anomaluridae</i></u>    | Scaly-tailed squirrel      | Not Noticeable                                                                 | <a href="http://www.exterminatorbrooklyn.com/large_image/squirrel/squirrel4.jpg">http://www.exterminatorbrooklyn.com/large_image/squirrel/squirrel4.jpg</a>                                                                                                                                                                                                                                                                                                                                                                         |

|                                |                              |                                                  |                                                                                                                                                                                                                                                                                                                                                                                                                                                                                                                                                                                             |
|--------------------------------|------------------------------|--------------------------------------------------|---------------------------------------------------------------------------------------------------------------------------------------------------------------------------------------------------------------------------------------------------------------------------------------------------------------------------------------------------------------------------------------------------------------------------------------------------------------------------------------------------------------------------------------------------------------------------------------------|
| <u><i>Aplodontiidae</i></u>    | Mountain beaver              | Not Noticeable                                   | <a href="https://www.mountainvalleyliving.com/online/wp-content/uploads/2010/01/bigstockphoto_Beaver_2812482.jpg">https://www.mountainvalleyliving.com/online/wp-content/uploads/2010/01/bigstockphoto_Beaver_2812482.jpg</a>                                                                                                                                                                                                                                                                                                                                                               |
| <u><i>Castoridae</i></u>       | North American Beaver        | Not Noticeable                                   | <a href="http://ferrebeekeeper.files.wordpress.com/2011/06/castor-fiber.jpg">http://ferrebeekeeper.files.wordpress.com/2011/06/castor-fiber.jpg</a>                                                                                                                                                                                                                                                                                                                                                                                                                                         |
| <u><i>Chrysochloridae</i></u>  | Golden mole                  | Non Functional<br>Eyes covered with skin and fur | <a href="http://www.notempire.com/images/uploads/Untitled-1-2509.jpg">http://www.notempire.com/images/uploads/Untitled-1-2509.jpg</a>                                                                                                                                                                                                                                                                                                                                                                                                                                                       |
| <u><i>Thyropteridae</i></u>    | Peter's disk-winged bat      | No, does not appear so (Do they even have eyes?) | <a href="http://farm4.static.flickr.com/3085/5724136173_7980c3efac.jpg">http://farm4.static.flickr.com/3085/5724136173_7980c3efac.jpg</a>                                                                                                                                                                                                                                                                                                                                                                                                                                                   |
| <u><i>Balaenidae</i></u>       | Right whale                  | No, does not appear so                           | <a href="http://www.whaleman.org/sites/default/files/gray%20whale%20eye.jpg">http://www.whaleman.org/sites/default/files/gray%20whale%20eye.jpg</a>                                                                                                                                                                                                                                                                                                                                                                                                                                         |
| <u><i>Balaenopteridae</i></u>  | Baleen whale                 | No, does not appear so                           | <a href="http://i.images.cdn.fotopedia.com/NvT_lbC6noA-wRZJpnd6oI-hd/World_Heritage_Sites/America/North_America/Mexico/Islands_and_Protected_Areas_of_the_Gulf_of_California/El_Vizcaino_Biosphere_Reserve/El_Vizcaino_Biosphere_Reserve-Baleen_whale-Cetacea-Eschrichtiidae-Eye-Gray_whale.jpg">http://i.images.cdn.fotopedia.com/NvT_lbC6noA-wRZJpnd6oI-hd/World_Heritage_Sites/America/North_America/Mexico/Islands_and_Protected_Areas_of_the_Gulf_of_California/El_Vizcaino_Biosphere_Reserve/El_Vizcaino_Biosphere_Reserve-Baleen_whale-Cetacea-Eschrichtiidae-Eye-Gray_whale.jpg</a> |
| <u><i>Bradypodidae</i></u>     | Three-toed sloth             | No, does not appear so                           | <a href="http://farm9.staticflickr.com/8373/8474996578_2a77443dc6_b.jpg">http://farm9.staticflickr.com/8373/8474996578_2a77443dc6_b.jpg</a>                                                                                                                                                                                                                                                                                                                                                                                                                                                 |
| <u><i>Myrmecophagidae</i></u>  | Giant anteater               | No, does not appear so                           | <a href="http://animal-backgrounds.com/files/Anteater/Giant_Anteater-desktop-wallpaper.jpg">http://animal-backgrounds.com/files/Anteater/Giant_Anteater-desktop-wallpaper.jpg</a>                                                                                                                                                                                                                                                                                                                                                                                                           |
| <u><i>Myzopodidae</i></u>      | Madagascar Sucker-footed Bat | No, does not appear so                           | <a href="http://images.nationalgeographic.com/wpf/media-live/photos/000/107/cache/upright-roosting-bat_10789_600x450.jpg">http://images.nationalgeographic.com/wpf/media-live/photos/000/107/cache/upright-roosting-bat_10789_600x450.jpg</a>                                                                                                                                                                                                                                                                                                                                               |
| <u><i>Natalidae</i></u>        | Funnel-eared bat             | No, does not appear so                           | <a href="http://farm9.staticflickr.com/8033/7953195746_f28ea4117e_z.jpg">http://farm9.staticflickr.com/8033/7953195746_f28ea4117e_z.jpg</a>                                                                                                                                                                                                                                                                                                                                                                                                                                                 |
| <u><i>Nycteridae</i></u>       | Hollow-faced bat             | No, does not appear so                           | <a href="http://en.academic.ru/pictures/enwiki/78/Nycteris_thebaica.jpg">http://en.academic.ru/pictures/enwiki/78/Nycteris_thebaica.jpg</a>                                                                                                                                                                                                                                                                                                                                                                                                                                                 |
| <u><i>Orycteropodidae</i></u>  | Aardvark                     | No, does not appear so                           | <a href="http://parrotnation.files.wordpress.com/2008/09/dscn0050.jpg">http://parrotnation.files.wordpress.com/2008/09/dscn0050.jpg</a>                                                                                                                                                                                                                                                                                                                                                                                                                                                     |
| <u><i>Phocoenidae</i></u>      | Harbour porpoise             | No, does not appear so                           | <a href="http://photos.zoochat.com/large/dscf14002-61511.jpg">http://photos.zoochat.com/large/dscf14002-61511.jpg</a>                                                                                                                                                                                                                                                                                                                                                                                                                                                                       |
| <u><i>Phyllostomidae</i></u>   | Leaf-nosed bat               | No, does not appear so                           | <a href="http://cdn1.arkive.org/media/1D/1D7B10F1-F155-4A5F-A630-218BBA6223FF/Presentation.Large/Shield-nosed-leaf-nosed-bat-with-wings-visible.jpg">http://cdn1.arkive.org/media/1D/1D7B10F1-F155-4A5F-A630-218BBA6223FF/Presentation.Large/Shield-nosed-leaf-nosed-bat-with-wings-visible.jpg</a>                                                                                                                                                                                                                                                                                         |
| <u><i>Pontoporiidae</i></u>    | La Plata dolphin             | No, does not appear so                           | <a href="http://www.wdcs.org/graphics_bin/franciscana_dolphin.jpg">http://www.wdcs.org/graphics_bin/franciscana_dolphin.jpg</a>                                                                                                                                                                                                                                                                                                                                                                                                                                                             |
| <u><i>Prionodontidae</i></u>   | Banded linsang               | No, does not appear so                           | <a href="http://photos.zoochat.com/large/8a_0278-205341.jpg">http://photos.zoochat.com/large/8a_0278-205341.jpg</a>                                                                                                                                                                                                                                                                                                                                                                                                                                                                         |
| <u><i>Solenodontidae</i></u>   | Cuban solenodon              | No, does not appear so                           | <a href="http://news.bbcimg.co.uk/media/images/63953000/jpg/_63953547_solenodon.jpg">http://news.bbcimg.co.uk/media/images/63953000/jpg/_63953547_solenodon.jpg</a>                                                                                                                                                                                                                                                                                                                                                                                                                         |
| <u><i>Thryonomyidae</i></u>    | Cane rat                     | No, does not appear so                           | <a href="http://writersthinkingallowed.files.wordpress.com/2012/10/cane.jpg">http://writersthinkingallowed.files.wordpress.com/2012/10/cane.jpg</a>                                                                                                                                                                                                                                                                                                                                                                                                                                         |
| <u><i>Talpidae</i></u>         | Mole                         | No eyes                                          | <a href="http://upload.wikimedia.org/wikipedia/commons/e/ed/Talpa_europaea_MHNT.jpg">http://upload.wikimedia.org/wikipedia/commons/e/ed/Talpa_europaea_MHNT.jpg</a>                                                                                                                                                                                                                                                                                                                                                                                                                         |
| <u><i>Dasyproctidae</i></u>    | Acouchis                     | No (Eyebrows, maybe?)                            | <a href="http://farm3.staticflickr.com/2106/2439301067_f96493bef1_o.jpg">http://farm3.staticflickr.com/2106/2439301067_f96493bef1_o.jpg</a>                                                                                                                                                                                                                                                                                                                                                                                                                                                 |
| <u><i>Bathyergidae</i></u>     | Mole rat                     | No                                               | <a href="http://blog.synthesis.net/wp-content/uploads/2008/06/naked-mole-rat.jpg">http://blog.synthesis.net/wp-content/uploads/2008/06/naked-mole-rat.jpg</a>                                                                                                                                                                                                                                                                                                                                                                                                                               |
| <u><i>Callitrichidae</i></u>   | Marmoset                     | No                                               | TAMARIN:<br><a href="http://farm6.staticflickr.com/5053/5510281132_6d28dfb29a_o.jpg">http://farm6.staticflickr.com/5053/5510281132_6d28dfb29a_o.jpg</a><br>MARMOSET:<br><a href="http://www.robertodemicheli.com/album_test/Wildlife/Misc/slides/_MG_3583.jpg">http://www.robertodemicheli.com/album_test/Wildlife/Misc/slides/_MG_3583.jpg</a>                                                                                                                                                                                                                                             |
| <u><i>Caviidae</i></u>         | Domestic guinea pig          | No                                               | <a href="https://upload.wikimedia.org/wikipedia/commons/8/8c/Guinea_Pig_35.jpg">https://upload.wikimedia.org/wikipedia/commons/8/8c/Guinea_Pig_35.jpg</a>                                                                                                                                                                                                                                                                                                                                                                                                                                   |
| <u><i>Cebidae</i></u>          | Capuchin monkey              | No                                               | <a href="http://farm8.staticflickr.com/7166/6601629505_db87d04eed_b.jpg">http://farm8.staticflickr.com/7166/6601629505_db87d04eed_b.jpg</a>                                                                                                                                                                                                                                                                                                                                                                                                                                                 |
| <u><i>Cheirogaleidae</i></u>   | Lemur                        | No                                               | <a href="http://farm7.staticflickr.com/6148/6039529714_45e2e7d279_z.jpg">http://farm7.staticflickr.com/6148/6039529714_45e2e7d279_z.jpg</a>                                                                                                                                                                                                                                                                                                                                                                                                                                                 |
| <u><i>Chinchillidae</i></u>    | Chinchilla                   | No                                               | <a href="http://www.chincare.com/IMAGES/healthmed/cataract.jpg">http://www.chincare.com/IMAGES/healthmed/cataract.jpg</a>                                                                                                                                                                                                                                                                                                                                                                                                                                                                   |
| <u><i>Craseonycteridae</i></u> | Kitti's hog-nosed bat        | No                                               | <a href="http://www.edgeofexistence.org/edgeblog/wp-content/uploads/2008/03/bumblebee-bat2.jpg">http://www.edgeofexistence.org/edgeblog/wp-content/uploads/2008/03/bumblebee-bat2.jpg</a>                                                                                                                                                                                                                                                                                                                                                                                                   |

|                        |                          |    |                                                                                                                                                                                                                                                                                                     |
|------------------------|--------------------------|----|-----------------------------------------------------------------------------------------------------------------------------------------------------------------------------------------------------------------------------------------------------------------------------------------------------|
| <u>Cricetidae</u>      | Vole                     | No | <a href="http://www.eastrocklandscape.com/field_vole.jpg">http://www.eastrocklandscape.com/field_vole.jpg</a>                                                                                                                                                                                       |
| <u>Ctenodactylidae</u> | Gundis or comb rat       | No | <a href="http://photos.zoochat.com/large/gundi_stuttgart_6th_september_2010-122957.jpg">http://photos.zoochat.com/large/gundi_stuttgart_6th_september_2010-122957.jpg</a>                                                                                                                           |
| <u>Ctenomyidae</u>     | Tuco-tuco                | No | <a href="http://www.fotonaturaleza.cl/data/media/2/IMG_0946cropf9.jpg">http://www.fotonaturaleza.cl/data/media/2/IMG_0946cropf9.jpg</a>                                                                                                                                                             |
| <u>Cyclopedidae</u>    | Silky anteater           | No | <a href="https://lh4.googleusercontent.com/-SCEbIXEUFKY/SmE-uZw9iJl/AAAAAAAAABsw/rMCj5xH2gfo/IMG_0519.JPG">https://lh4.googleusercontent.com/-SCEbIXEUFKY/SmE-uZw9iJl/AAAAAAAAABsw/rMCj5xH2gfo/IMG_0519.JPG</a>                                                                                     |
| <u>Cynocephalidae</u>  | Colugo                   | No | <a href="http://daddu.net/wp-content/uploads/2010/02/Colugo-view.jpg">http://daddu.net/wp-content/uploads/2010/02/Colugo-view.jpg</a>                                                                                                                                                               |
| <u>Dasypodidae</u>     | Armadillo                | No | <a href="http://farm1.static.flickr.com/23/29730072_8d8fea5fc2.jpg">http://farm1.static.flickr.com/23/29730072_8d8fea5fc2.jpg</a>                                                                                                                                                                   |
| <u>Daubentonidae</u>   | Aye-aye (Lemur)          | No | <a href="http://i3.ytimg.com/vi/jHs5POy8-8Y/maxresdefault.jpg">http://i3.ytimg.com/vi/jHs5POy8-8Y/maxresdefault.jpg</a>                                                                                                                                                                             |
| <u>Delphinidae</u>     | Oceanic dolphin          | No | <a href="http://th09.deviantart.net/fs49/PRE/f/2009/236/6/5/659ecc549c46669a5fac7e0b8755daf6.png">http://th09.deviantart.net/fs49/PRE/f/2009/236/6/5/659ecc549c46669a5fac7e0b8755daf6.png</a>                                                                                                       |
| <u>Dinomyidae</u>      | Pacarana                 | No | <a href="http://www.machupicchu360.org/machu-picchu-peru/photo-gallery-machu-picchu/fotos_fauna/machu-picchu-fotos-19c.jpg">http://www.machupicchu360.org/machu-picchu-peru/photo-gallery-machu-picchu/fotos_fauna/machu-picchu-fotos-19c.jpg</a>                                                   |
| <u>Dipodidae</u>       | Jumping mice             | No | <a href="http://www2.ohiodnr.com/portals/wildlife/Species%20and%20Habitats/Species%20Guide%20Index/Images/housemouse.jpg">http://www2.ohiodnr.com/portals/wildlife/Species%20and%20Habitats/Species%20Guide%20Index/Images/housemouse.jpg</a>                                                       |
| <u>Dugongidae</u>      | Dugong                   | No | <a href="http://cdn1.arkive.org/media/0E/0E280C5A-D487-4420-9C98-8ED7F0D38A21/Presentation.Large/Dugong-eye-detail.jpg">http://cdn1.arkive.org/media/0E/0E280C5A-D487-4420-9C98-8ED7F0D38A21/Presentation.Large/Dugong-eye-detail.jpg</a>                                                           |
| <u>Echimyidae</u>      | Neotropical spiny rat    | No | <a href="http://ds-lands.com/data_images/animals/spiny-rat/spiny-rat-01.jpg">http://ds-lands.com/data_images/animals/spiny-rat/spiny-rat-01.jpg</a>                                                                                                                                                 |
| <u>Emballonuridae</u>  | Ghost bat                | No | <a href="http://25.media.tumblr.com/tumblr_lzzktm0iF01qga09po1_500.jpg">http://25.media.tumblr.com/tumblr_lzzktm0iF01qga09po1_500.jpg</a>                                                                                                                                                           |
| <u>Erethizontidae</u>  | New World porcupine      | No | <a href="http://www.biolib.cz/IMG/GAL/BIG/38102.jpg">http://www.biolib.cz/IMG/GAL/BIG/38102.jpg</a>                                                                                                                                                                                                 |
| <u>Erinaceidae</u>     | Hedgehog                 | No | <a href="http://www.mrwallpaper.com/wallpapers/Cute-Hedgehog.jpg">http://www.mrwallpaper.com/wallpapers/Cute-Hedgehog.jpg</a>                                                                                                                                                                       |
| <u>Eupleridae</u>      | Fossa                    | No | <a href="http://photos.zoochat.com/large/fossa_sandwich_30th_april_2011-143698.jpg">http://photos.zoochat.com/large/fossa_sandwich_30th_april_2011-143698.jpg</a>                                                                                                                                   |
| <u>Felidae</u>         | Tiger                    | No | <a href="http://i25.photobucket.com/albums/c59/telyse3/351Tiger_Eyesx.jpg">http://i25.photobucket.com/albums/c59/telyse3/351Tiger_Eyesx.jpg</a>                                                                                                                                                     |
| <u>Furipteridae</u>    | Smokey Bat               | No | <a href="http://www.milbourne.net/HOSTEDSITES/blagdonlakebirds/Assets/myimages/1DS14052%20Whiskered%20Bat,%20Butcombe%20Bank,%20Blagdon%20Lake.JPG">http://www.milbourne.net/HOSTEDSITES/blagdonlakebirds/Assets/myimages/1DS14052%20Whiskered%20Bat,%20Butcombe%20Bank,%20Blagdon%20Lake.JPG</a>   |
| <u>Galaqidae</u>       | Bushbaby                 | No | <a href="http://www.animalpictures123.org/wp-content/uploads/2012/06/Demidoffs-Bush-Baby.jpg">http://www.animalpictures123.org/wp-content/uploads/2012/06/Demidoffs-Bush-Baby.jpg</a>                                                                                                               |
| <u>Geomysidae</u>      | Pocket gopher            | No | <a href="http://farm6.staticflickr.com/5110/5597131228_80ee407e6f_o.jpg">http://farm6.staticflickr.com/5110/5597131228_80ee407e6f_o.jpg</a>                                                                                                                                                         |
| <u>Gliridae</u>        | Dormouse                 | No | <a href="http://www.devon.gov.uk/dormouse.jpg">http://www.devon.gov.uk/dormouse.jpg</a>                                                                                                                                                                                                             |
| <u>Heteromyidae</u>    | Kangaroo rat             | No | <a href="http://rmbo.org/v3/Portals/0/Images/Blog%20feature%20stories/12-10-17%20Ord's%20Kangaroo%20Rat.jpg">http://rmbo.org/v3/Portals/0/Images/Blog%20feature%20stories/12-10-17%20Ord's%20Kangaroo%20Rat.jpg</a>                                                                                 |
| <u>Hippopotamidae</u>  | Hippopotamus             | No | <a href="http://farm6.staticflickr.com/5063/5628746490_d4d06f6de8_z.jpg">http://farm6.staticflickr.com/5063/5628746490_d4d06f6de8_z.jpg</a>                                                                                                                                                         |
| <u>Hylobatidae</u>     | Gibbon                   | No | <a href="http://www.wfft.org/wp-content/uploads/2012/11/cosmo.jpg">http://www.wfft.org/wp-content/uploads/2012/11/cosmo.jpg</a>                                                                                                                                                                     |
| <u>Hyperoodontidae</u> | Beaked whale (Ziphiidae) | No | No good evidence                                                                                                                                                                                                                                                                                    |
| <u>Hystricidae</u>     | Old World porcupine      | No | <a href="http://www.redorbit.com/media/uploads/2004/10/42_90863616636d8791fbfc212cda649d5f.jpg">http://www.redorbit.com/media/uploads/2004/10/42_90863616636d8791fbfc212cda649d5f.jpg</a>                                                                                                           |
| <u>Indriidae</u>       | Four Toothed Lemur       | No | <a href="http://en.academic.ru/pictures/enwiki/83/Sifaka_in_Madagascar.jpg">http://en.academic.ru/pictures/enwiki/83/Sifaka_in_Madagascar.jpg</a>                                                                                                                                                   |
| <u>Iniidae</u>         | River dolphin            | No | <a href="http://assets.worldwildlife.org/photos/3577/images/story_full_width/amazon_river_dolphin_naturepl.com_tood_pusser_wwf_canon.JPG?1360265162">http://assets.worldwildlife.org/photos/3577/images/story_full_width/amazon_river_dolphin_naturepl.com_tood_pusser_wwf_canon.JPG?1360265162</a> |
| <u>Lemuridae</u>       | Lemurid                  | No | <a href="http://upload.wikimedia.org/wikipedia/commons/a/ac/Eulemur_mongoz_%28male_-_face%29.jpg">http://upload.wikimedia.org/wikipedia/commons/a/ac/Eulemur_mongoz_%28male_-_face%29.jpg</a>                                                                                                       |
| <u>Lepilemuridae</u>   | Lepilemur                | No | <a href="http://upload.wikimedia.org/wikipedia/commons/7/77/Lepilemur_edwardsi.jpg">http://upload.wikimedia.org/wikipedia/commons/7/77/Lepilemur_edwardsi.jpg</a>                                                                                                                                   |
| <u>Lorisidae</u>       | Loris                    | No | <a href="http://lemur.duke.edu/wp-content/uploads/2012/09/p0000000952.jpg">http://lemur.duke.edu/wp-content/uploads/2012/09/p0000000952.jpg</a>                                                                                                                                                     |
| <u>Manidae</u>         | Pangolin                 | No | <a href="http://3.bp.blogspot.com/_wLdWNe857CQ/Tct21C690I/AAAAAAAAAfA/L4MNqBa2VvE/s1600/25.jpg">http://3.bp.blogspot.com/_wLdWNe857CQ/Tct21C690I/AAAAAAAAAfA/L4MNqBa2VvE/s1600/25.jpg</a>                                                                                                           |
| <u>Megadermatidae</u>  | False Vampire Bat        | No | <a href="http://farm7.staticflickr.com/6198/6129869755_bbf36f447f_z.jpg">http://farm7.staticflickr.com/6198/6129869755_bbf36f447f_z.jpg</a>                                                                                                                                                         |
| <u>Megalonychidae</u>  | Two toed sloth           | No | <a href="http://upload.wikimedia.org/wikipedia/commons/b/b1/Two_toed_sloth.JPG">http://upload.wikimedia.org/wikipedia/commons/b/b1/Two_toed_sloth.JPG</a>                                                                                                                                           |
| <u>Mephitidae</u>      | Skunk                    | No | <a href="http://images.pictureshant.com/pics/s/skunk-8832.JPG">http://images.pictureshant.com/pics/s/skunk-8832.JPG</a>                                                                                                                                                                             |
| <u>Molossidae</u>      | Mastiff bat              | No | <a href="http://lh3.ggpht.com/-OR8B7jIl6HmlaYLwbZOhBYxZmER71Lq-Z_BpCZhcGVHLV-hSBFFD8c-aKyw5HGckR0-XnCVFqa0TTBVu8=s1200">http://lh3.ggpht.com/-OR8B7jIl6HmlaYLwbZOhBYxZmER71Lq-Z_BpCZhcGVHLV-hSBFFD8c-aKyw5HGckR0-XnCVFqa0TTBVu8=s1200</a>                                                           |

|                          |                              |    |                                                                                                                                                                                                                                                               |
|--------------------------|------------------------------|----|---------------------------------------------------------------------------------------------------------------------------------------------------------------------------------------------------------------------------------------------------------------|
| <u>Monodontidae</u>      | Beluga Whale                 | No | <a href="http://demos.ithemes.com/kepler-light/files/2011/08/Hello-lnuk_23648529_m.jpg">http://demos.ithemes.com/kepler-light/files/2011/08/Hello-lnuk_23648529_m.jpg</a>                                                                                     |
| <u>Mormoopidae</u>       | Ghost Faced bat              | No | <a href="http://farm3.staticflickr.com/2166/1777987598_4ea13ab227_o.jpg">http://farm3.staticflickr.com/2166/1777987598_4ea13ab227_o.jpg</a>                                                                                                                   |
| <u>Muridae</u>           | True mice                    | No | <a href="http://www.warrenphotographic.co.uk/photography/big/34248-Baby-yellow-necked-mice-white-background.jpg">http://www.warrenphotographic.co.uk/photography/big/34248-Baby-yellow-necked-mice-white-background.jpg</a>                                   |
| <u>Mustelidae</u>        | Weasel                       | No | <a href="http://pophaydn.files.wordpress.com/2011/11/weasel-credit-karen-white-resize.jpg">http://pophaydn.files.wordpress.com/2011/11/weasel-credit-karen-white-resize.jpg</a>                                                                               |
| <u>Myocastoridae</u>     | Coypu                        | No | <a href="http://1.bp.blogspot.com/_PwaTKtg0CtY/TBv1xGgvPMI/AAAAAAAAABnk/QktLGs8wWtY/s1600/Myocastor_Coypus_Nutria_Biberratte.jpg">http://1.bp.blogspot.com/_PwaTKtg0CtY/TBv1xGgvPMI/AAAAAAAAABnk/QktLGs8wWtY/s1600/Myocastor_Coypus_Nutria_Biberratte.jpg</a> |
| <u>Mystacinidae</u>      | New Zealand short-tailed bat | No | <a href="http://static.stuff.co.nz/1339481427/480/7090480.jpg">http://static.stuff.co.nz/1339481427/480/7090480.jpg</a>                                                                                                                                       |
| <u>Nandiniidae</u>       | African palm civet           | No | <a href="http://www.biodiversityexplorer.org/mammals/carnivora/images/5108450362_22e3e68b8d_658w.jpg">http://www.biodiversityexplorer.org/mammals/carnivora/images/5108450362_22e3e68b8d_658w.jpg</a>                                                         |
| <u>Noctilionidae</u>     | Bulldog bat                  | No | <a href="http://onemoregeneration.org/wp-content/uploads/2011/03/OMG-Trivia-03-04-11.jpg.png">http://onemoregeneration.org/wp-content/uploads/2011/03/OMG-Trivia-03-04-11.jpg.png</a>                                                                         |
| <u>Ochotonidae</u>       | Pika                         | No | <a href="http://florafunfungi.com/wp-content/uploads/2012/09/American-Pika-Ochotona-princeps.jpg">http://florafunfungi.com/wp-content/uploads/2012/09/American-Pika-Ochotona-princeps.jpg</a>                                                                 |
| <u>Octodontidae</u>      | Degu                         | No | <a href="http://3.bp.blogspot.com/_nO36AMjqojc/TU7HwPLiEKI/AAAAAAAAAWI/sF5w2QeKkX4/s1600/daily+degu201.jpg">http://3.bp.blogspot.com/_nO36AMjqojc/TU7HwPLiEKI/AAAAAAAAAWI/sF5w2QeKkX4/s1600/daily+degu201.jpg</a>                                             |
| <u>Odobenidae</u>        | Walrus                       | No | <a href="http://upload.wikimedia.org/wikipedia/commons/3/37/Walrus_-_Kamogawa_Seaworld_-_1.jpg">http://upload.wikimedia.org/wikipedia/commons/3/37/Walrus_-_Kamogawa_Seaworld_-_1.jpg</a>                                                                     |
| <u>Otariidae</u>         | Eared seal                   | No | <a href="http://farm4.staticflickr.com/3514/5736446255_732cb5e54f_o.jpg">http://farm4.staticflickr.com/3514/5736446255_732cb5e54f_o.jpg</a>                                                                                                                   |
| <u>Pedetidae</u>         | Springhare                   | No | <a href="http://media.web.britannica.com/eb-media/00/4400-050-AE078316.jpg">http://media.web.britannica.com/eb-media/00/4400-050-AE078316.jpg</a>                                                                                                             |
| <u>Petromuridae</u>      | Dassie rat                   | No | <a href="http://focusingonwildlife.com/news/wp-content/uploads/2012/05/Hyrax-Rock-Erongo-Mountains-Namibia-AR-37.jpg">http://focusingonwildlife.com/news/wp-content/uploads/2012/05/Hyrax-Rock-Erongo-Mountains-Namibia-AR-37.jpg</a>                         |
| <u>Phocidae</u>          | True seal                    | No | <a href="http://en.academic.ru/pictures/enwiki/83/Seehund.jpg">http://en.academic.ru/pictures/enwiki/83/Seehund.jpg</a>                                                                                                                                       |
| <u>Physeteridae</u>      | Sperm whale                  | No | <a href="http://www.amosphotography.com/data/photos/242_1sperm_whale_enigma_eye_upclose.jpg">http://www.amosphotography.com/data/photos/242_1sperm_whale_enigma_eye_upclose.jpg</a>                                                                           |
| <u>Platacanthomyidae</u> | Chinese pygmy dormice        | No | <a href="http://i263.photobucket.com/albums/ii135/jackieandarchie/IMG_3765.jpg">http://i263.photobucket.com/albums/ii135/jackieandarchie/IMG_3765.jpg</a>                                                                                                     |
| <u>Platanistidae</u>     | Ganges river dolphin         | No | <a href="http://img.docstoccdn.com/thumb/orig/79854493.png">http://img.docstoccdn.com/thumb/orig/79854493.png</a>                                                                                                                                             |
| <u>Procaviidae</u>       | Hyrax                        | No | <a href="http://upload.wikimedia.org/wikipedia/commons/0/0c/Yellow-spotted_Rock_Hyrax.jpg">http://upload.wikimedia.org/wikipedia/commons/0/0c/Yellow-spotted_Rock_Hyrax.jpg</a>                                                                               |
| <u>Pteropodidae</u>      | Fruit bat                    | No | <a href="http://sprudge.com/wp-content/uploads/2011/08/fruitbatespresso.jpg">http://sprudge.com/wp-content/uploads/2011/08/fruitbatespresso.jpg</a>                                                                                                           |
| <u>Ptilocercidae</u>     | Pen-tailed tree-shrew        | No | <a href="http://www.eversostrange.com/wp-content/uploads/2011/04/treeshrew.jpg">http://www.eversostrange.com/wp-content/uploads/2011/04/treeshrew.jpg</a>                                                                                                     |
| <u>Rhinolophidae</u>     | Horseshoe bat                | No | <a href="http://3.bp.blogspot.com/-dd6EtcfbzUo/TqRR234utPI/AAAAAAAAAd4/AD7FPxjPF_g/s1600/Horseshoe+Bat-1.jpg">http://3.bp.blogspot.com/-dd6EtcfbzUo/TqRR234utPI/AAAAAAAAAd4/AD7FPxjPF_g/s1600/Horseshoe+Bat-1.jpg</a>                                         |
| <u>Rhinopomatidae</u>    | Mouse-tailed bat             | No | <a href="http://farm5.staticflickr.com/4140/4779800962_26724b8f41_b.jpg">http://farm5.staticflickr.com/4140/4779800962_26724b8f41_b.jpg</a>                                                                                                                   |
| <u>Sciuridae</u>         | Squirrel                     | No | <a href="http://2.bp.blogspot.com/-2FnpfRh2vwk/ThE6G_JEtxl/AAAAAAAAApw/h_RfA4QvVI8/s1600/squirrel-jp.jpg">http://2.bp.blogspot.com/-2FnpfRh2vwk/ThE6G_JEtxl/AAAAAAAAApw/h_RfA4QvVI8/s1600/squirrel-jp.jpg</a>                                                 |
| <u>Soricidae</u>         | Shrew                        | No | <a href="http://newsdesk.si.edu/sites/default/files/photos/National%20Zoo%20Elphant%20Shrew.jpg">http://newsdesk.si.edu/sites/default/files/photos/National%20Zoo%20Elphant%20Shrew.jpg</a>                                                                   |
| <u>Spalacidae</u>        | Lesser bamboo Rat            | No | <a href="http://www.biolib.cz/IMG/GAL/BIG/152440.jpg">http://www.biolib.cz/IMG/GAL/BIG/152440.jpg</a>                                                                                                                                                         |
| <u>Tapiridae</u>         | Tapir                        | No | <a href="http://photos.zoochat.com/large/malayan_tapir_ed_20_10_2009-105636.jpg">http://photos.zoochat.com/large/malayan_tapir_ed_20_10_2009-105636.jpg</a>                                                                                                   |
| <u>Tarsiidae</u>         | Tarsiers                     | No | <a href="http://blogs.scientificamerican.com/observations/files/2012/02/tarsier.jpg">http://blogs.scientificamerican.com/observations/files/2012/02/tarsier.jpg</a>                                                                                           |
| <u>Trichechidae</u>      | Manatee                      | No | <a href="http://barbarabockman.files.wordpress.com/2010/11/prose_1.jpg">http://barbarabockman.files.wordpress.com/2010/11/prose_1.jpg</a>                                                                                                                     |
| <u>Tupaïidae</u>         | Treeshrew                    | No | <a href="http://ds-lands.com/data_images/animals/common-tree-shrew/common-tree-shrew-10.jpg">http://ds-lands.com/data_images/animals/common-tree-shrew/common-tree-shrew-10.jpg</a>                                                                           |
| <u>Ursidae</u>           | Polar Bear                   | No | <a href="http://upload.wikimedia.org/wikipedia/commons/f/f8/Polar_Bear_0319_-_23-11-06.jpg">http://upload.wikimedia.org/wikipedia/commons/f/f8/Polar_Bear_0319_-_23-11-06.jpg</a>                                                                             |
| <u>Vespertilionidae</u>  | Evening bat                  | No | <a href="http://1.bp.blogspot.com/-62ZbPk-OgWQ/TIRriOgahLI/AAAAAAAAAW0/ret6PKURzco/s1600/CHOMEX.jpg">http://1.bp.blogspot.com/-62ZbPk-OgWQ/TIRriOgahLI/AAAAAAAAAW0/ret6PKURzco/s1600/CHOMEX.jpg</a>                                                           |
| <u>Viverridae</u>        | Palm Civet                   | No | <a href="http://farm4.staticflickr.com/3024/2740021247_a5fea844d8_o.jpg">http://farm4.staticflickr.com/3024/2740021247_a5fea844d8_o.jpg</a>                                                                                                                   |
| <u>Tenrecidae</u>        | Tenrec                       | No | <a href="http://www.saczoo.org/view.image?id=1221">http://www.saczoo.org/view.image?id=1221</a>                                                                                                                                                               |

|                                |                                                                       |         |                                                                                                                                                                                   |
|--------------------------------|-----------------------------------------------------------------------|---------|-----------------------------------------------------------------------------------------------------------------------------------------------------------------------------------|
| <u><i>Procyonidae</i></u>      | Raccoon                                                               | Maybe   | <a href="http://www.listofimages.com/wp-content/uploads/2012/07/raccoon-tongue-animals.jpg">http://www.listofimages.com/wp-content/uploads/2012/07/raccoon-tongue-animals.jpg</a> |
| <u><i>Lipotidae</i></u>        | Baiji Extinct (2006)                                                  | Extinct | Extinct                                                                                                                                                                           |
| <u><i>Prorastomidae</i></u>    | Extinct (Ancient Manatee)                                             | Extinct | Extinct                                                                                                                                                                           |
| <u><i>Protosirenidae</i></u>   | Extinct                                                               | Extinct | Extinct                                                                                                                                                                           |
| <u><i>Cetotheriidae</i></u>    | Extinct (Possibly Resurrecting the family with the Pygmy Right Whale) | Extinct | Extinct                                                                                                                                                                           |
| <u><i>Enaliarctidae</i></u>    | Extinct                                                               | Extinct | Extinct                                                                                                                                                                           |
| <u><i>Gomphotheriidae</i></u>  | Extinct                                                               | Extinct | Extinct                                                                                                                                                                           |
| <u><i>Hemicyonidae</i></u>     | Extinct                                                               | Extinct | Extinct                                                                                                                                                                           |
| <u><i>Hyopsodontidae</i></u>   | Extinct                                                               | Extinct | Extinct                                                                                                                                                                           |
| <u><i>Lambdaotheriidae</i></u> | Extinct                                                               | Extinct | Extinct                                                                                                                                                                           |
| <u><i>Nimravidae</i></u>       | Extinct (False Sabertooth Cat)                                        | Extinct | Extinct                                                                                                                                                                           |
| <u><i>Pelocetidae</i></u>      | Extinct (Ancient Baleen Whales)                                       | Extinct | Extinct                                                                                                                                                                           |
| <u><i>Percrocutidae</i></u>    | Extinct (Hyena-like)                                                  | Extinct | Extinct                                                                                                                                                                           |
| <u><i>Stenoplesictidae</i></u> | Extinct (civet-like animals)                                          | Extinct | Extinct                                                                                                                                                                           |
